# Supplementary material for: The nature of G⋯E–Y σ(3c–4e) in o-MenGCH2C6H4EY (MenG = Me2N and MeE; E = O, S, Se and Te; Y = F, Cl, Br, EMe and Me) with contributions from CT and compliance constants in noncovalent G⋯E interactions
Source: Royal Society of Chemistry journal article supplement (doi:10.1039/c9ra09022c), 2019-01-01
Supplement: c9ra09022c1.pdf [file c9ra09022c1.pdf]

## Supporting Information

### **The Nature of G---E–Y $\sigma(3c-4e)$ in *o*-Me<sub>n</sub>GCH<sub>2</sub>C<sub>6</sub>H<sub>4</sub>EY (Me<sub>n</sub>G = Me<sub>2</sub>N and MeE; E = O, S, Se and Te; Y = F, Cl, Br, EMe and Me) with Contributions from CT and Compliance Constants in Noncovalent G---E Interactions†**

Satoko Hayashi,<sup>\*,1</sup> Taro Nishide,<sup>1</sup> Waro Nakanishi,<sup>\*,1</sup> Luca Sancineto<sup>2</sup> and Claudio Santi<sup>\*,3</sup>

<sup>1</sup>*Faculty of Systems Engineering, Wakayama University, 930 Sakaedani, Wakayama 640-8510 (Japan) E-mail: hayashi3@sys.wakayama-u.ac.jp and nakanisi@sys.wakayama-u.ac.jp; Tel: +81 73 457 8252*

<sup>2</sup>*Department of Heteroorganic Chemistry, Center of Molecular and Macromolecular Studies of the Polish Academy of Sciences, Łódź (Poland)*

<sup>3</sup>*Dipartimento di Chimica e Tecnologia del Farmaco, Università degli Studi di Perugia, Via del Liceo 1, 06123 Perugia (Italy) E-mail: claudio.santi@unipg.it; Tel: +39 075 5855102*

| <b>Table of Contents</b>                                                                              | <b>Pages</b> |
|-------------------------------------------------------------------------------------------------------|--------------|
| Survey of QTAIM, closely related to QTAIM dual functional analysis                                    | 2–4          |
| Criteria for classification of interactions: behavior of typical interactions elucidated by QTAIM-DFA | 5            |
| Characterization of interactions                                                                      | 5–7          |
| Additional figures and tables                                                                         | 8–16         |
| References                                                                                            | 17           |
| Computation information and geometries of compounds                                                   | 18–44        |

## Survey of QTAIM, closely related to QTAIM dual functional analysis (QTAIM-DFA)

The bond critical point (BCP; \*) is an important concept in QTAIM. The BCP of  $(\omega, \sigma) = (3, -1)$ <sup>S1</sup> is a point along the bond path (BP) at the interatomic surface, where charge density  $\rho(\mathbf{r})$  reaches a minimum. It is denoted by  $\rho_b(\mathbf{r}_c)$ , so are other QTAIM functions, such as the total electron energy densities  $H_b(\mathbf{r}_c)$ , potential energy densities  $V_b(\mathbf{r}_c)$  and kinetic energy densities  $G_b(\mathbf{r}_c)$  at the BCPs. A chemical bond or interaction between A and B is denoted by A–B, which corresponds to the BP between A and B in QTAIM. We will use A-\*–B for BP, where the asterisk emphasizes the presence of a BCP in A–B.

The sign of the Laplacian  $\rho_b(\mathbf{r}_c)$  ( $\nabla^2\rho_b(\mathbf{r}_c)$ ) indicates that  $\rho_b(\mathbf{r}_c)$  is depleted or concentrated with respect to its surrounding, since  $\nabla^2\rho_b(\mathbf{r}_c)$  is the second derivative of  $\rho_b(\mathbf{r}_c)$ .  $\rho_b(\mathbf{r}_c)$  is locally depleted relative to the average distribution around  $\mathbf{r}_c$  if  $\nabla^2\rho_b(\mathbf{r}_c) > 0$ , but it is concentrated when  $\nabla^2\rho_b(\mathbf{r}_c) < 0$ . Total electron energy densities at BCPs ( $H_b(\mathbf{r}_c)$ ) must be a more appropriate measure for weak interactions on the energy basis.<sup>S1–S8</sup>  $H_b(\mathbf{r}_c)$  are the sum of kinetic energy densities ( $G_b(\mathbf{r}_c)$ ) and potential energy densities ( $V_b(\mathbf{r}_c)$ ) at BCPs, as shown in Equation (2) (S1). Electrons at BCPs are stabilized when  $H_b(\mathbf{r}_c) < 0$ , therefore, interactions exhibit the covalent nature in this region, whereas they exhibit no covalency if  $H_b(\mathbf{r}_c) > 0$ , due to the destabilization of electrons at BCPs under the conditions.<sup>S1</sup> Equation (S2) represents the relation between  $\nabla^2\rho_b(\mathbf{r}_c)$  and  $H_b(\mathbf{r}_c)$ , together with  $G_b(\mathbf{r}_c)$  and  $V_b(\mathbf{r}_c)$ , which is closely related to the virial theorem.

$$H_b(\mathbf{r}_c) = G_b(\mathbf{r}_c) + V_b(\mathbf{r}_c) \quad (\text{S1})$$

$$(\hbar^2/8m)\nabla^2\rho_b(\mathbf{r}_c) = H_b(\mathbf{r}_c) - V_b(\mathbf{r}_c)/2 \quad (\text{S2})$$

$$= G_b(\mathbf{r}_c) + V_b(\mathbf{r}_c)/2 \quad (\text{S2}')$$

Interactions are classified by the signs of  $\nabla^2\rho_b(\mathbf{r}_c)$  and  $H_b(\mathbf{r}_c)$ . Interactions in the region of  $\nabla^2\rho_b(\mathbf{r}_c) < 0$  are called shared-shell (SS) interactions and they are closed-shell (CS) interactions for  $\nabla^2\rho_b(\mathbf{r}_c) > 0$ .  $H_b(\mathbf{r}_c)$  must be negative when  $\nabla^2\rho_b(\mathbf{r}_c) < 0$ , since  $H_b(\mathbf{r}_c)$  are larger than  $(\hbar^2/8m)\nabla^2\rho_b(\mathbf{r}_c)$  by  $V_b(\mathbf{r}_c)/2$  with negative  $V_b(\mathbf{r}_c)$  at all BCPs (Equation (S2)). Consequently,  $\nabla^2\rho_b(\mathbf{r}_c) < 0$  and  $H_b(\mathbf{r}_c) < 0$  for the SS interactions. The CS interactions are especially called *pure* CS interactions for  $H_b(\mathbf{r}_c) > 0$  and  $\nabla^2\rho_b(\mathbf{r}_c) > 0$ , since electrons at BCPs are depleted and destabilized under the conditions.<sup>S1a</sup> Electrons in the intermediate region between SS and *pure* CS, which belong to CS, are locally depleted but stabilized at BCPs, since  $\nabla^2\rho_b(\mathbf{r}_c) > 0$  but  $H_b(\mathbf{r}_c) < 0$ .<sup>S1a</sup> We call the interactions in this region *regular* CS,<sup>S4,S5</sup> when it is necessary to distinguish from *pure* CS. The role of  $\nabla^2\rho_b(\mathbf{r}_c)$  in the classification can be replaced by  $H_b(\mathbf{r}_c) - V_b(\mathbf{r}_c)/2$ , since  $(\hbar^2/8m)\nabla^2\rho_b(\mathbf{r}_c) = H_b(\mathbf{r}_c) - V_b(\mathbf{r}_c)/2$  (Equation (S2)). Scheme S1 summarizes the classification.

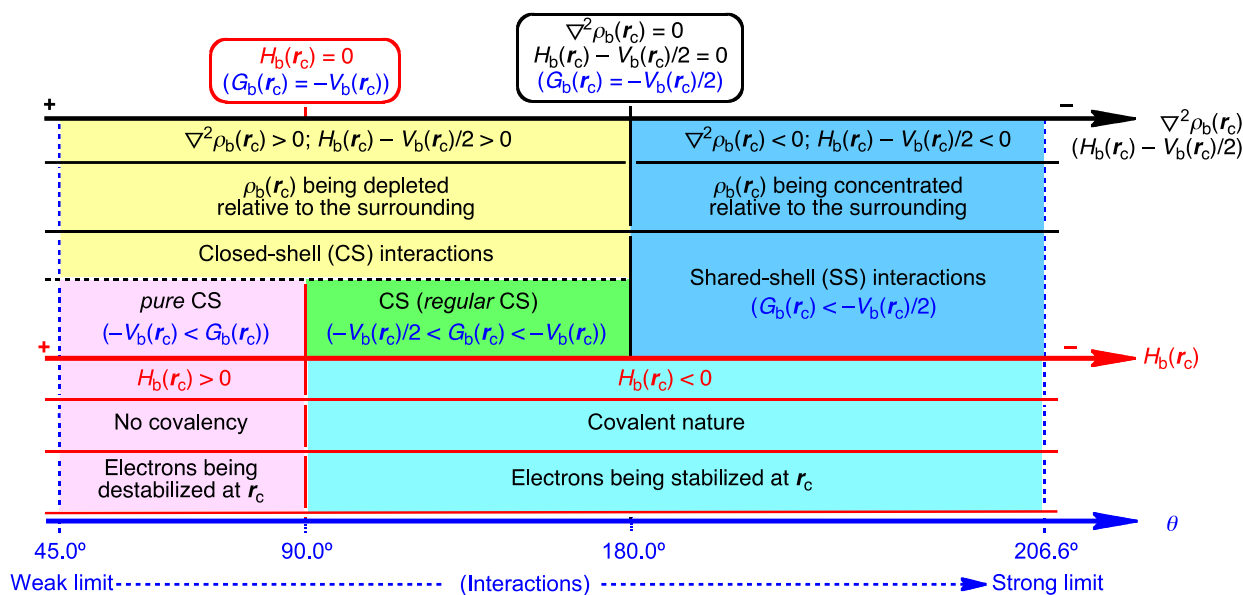

**Scheme S1.** Classification of interactions by the signs of  $\nabla^2\rho_b(r_c)$  and  $H_b(r_c)$ , together with  $G_b(r_c)$  and  $V_b(r_c)$ .

We proposed QTAIM-DFA by plotting  $H_b(r_c)$  versus  $H_b(r_c) - V_b(r_c)/2 (= (\hbar^2/8m)\nabla^2\rho_b(r_c))$ ,<sup>s4a</sup> after the proposal of  $H_b(r_c)$  versus  $\nabla^2\rho_b(r_c)$ .<sup>s4b</sup> Both axes in the plot of the former are given in energy unit, therefore, distances on the  $(x, y) (= (H_b(r_c) - V_b(r_c)/2, H_b(r_c)))$  plane can be expressed in the energy unit, which provides an analytical development. QTAIM-DFA incorporates the classification of interactions by the signs of  $\nabla^2\rho_b(r_c)$  and  $H_b(r_c)$ . Scheme S2 summarizes the QTAIM-DFA treatment. Interactions of *pure* CS appear in the first quadrant, those of *regular* CS in the fourth quadrant and SS interactions do in the third quadrant. No interactions appear in the second one.

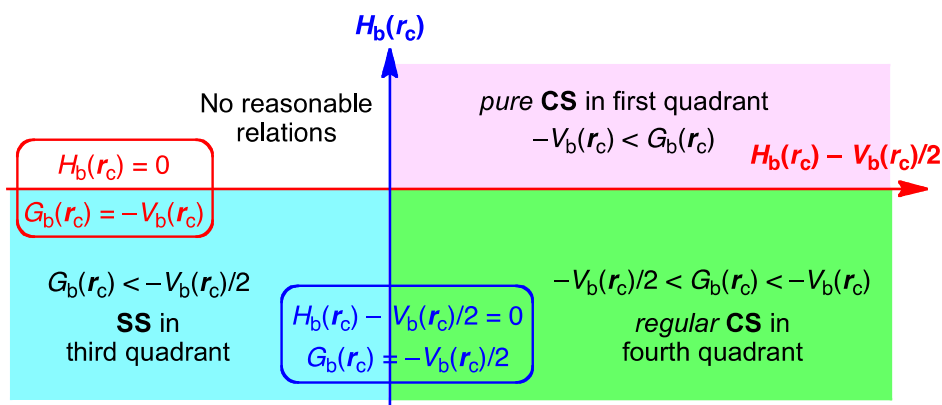

**Scheme S2.** QTAIM-DFA: Plot of  $H_b(r_c)$  versus  $H_b(r_c) - V_b(r_c)/2$  for Weak to Strong Interactions

In our treatment, data for perturbed structures around fully optimized structures are also employed for the plots, together with the fully optimized ones (see Figure S1).<sup>s4-s8</sup> We proposed the concept of the "dynamic nature of interaction" originated from the perturbed structures. The behavior of interactions at the fully optimized structures corresponds to "the static nature of

interactions", whereas that containing perturbed structures exhibit the "dynamic nature of interaction" as explained below. The method to generate the perturbed structures is discussed later. Plots of  $H_b(\mathbf{r}_c)$  versus  $H_b(\mathbf{r}_c) - V_b(\mathbf{r}_c)/2$  are analyzed employing the polar coordinate  $(R, \theta)$  representation with  $(\theta_p, \kappa_p)$  parameters. S4a, S5-S8 Figure S1 explains the treatment.  $R$  in  $(R, \theta)$  is defined by Equation (S3) and given in the energy unit. Indeed,  $R$  does not correspond to the usual interaction energy, but it does to the local energy at BCP, expressed by  $[(H_b(\mathbf{r}_c))^2 + (H_b(\mathbf{r}_c) - V_b(\mathbf{r}_c)/2)^2]^{1/2}$  in the plot (cf: Equation (S3)), where  $R = 0$  for the enough large interaction distance. The plots show a spiral stream, as a whole.  $\theta$  in  $(R, \theta)$  defined by Equation (S4), measured from the  $y$ -axis, controls the spiral stream of the plot. Each plot for an interaction shows a specific curve, which provides important information of the interaction (see Figure S1). The curve is expressed by  $\theta_p$  and  $\kappa_p$ . While  $\theta_p$ , defined by Equation (S5) and measured from the  $y$ -direction, corresponds to the tangent line of a plot, where  $\theta_p$  is calculated employing data of the perturbed structures with a fully-optimized structure and  $\kappa_p$  is the curvature of the plot (Equation (S6)). While  $(R, \theta)$  correspond to the static nature,  $(\theta_p, \kappa_p)$  represent the dynamic nature of interactions. We call  $(R, \theta)$  and  $(\theta_p, \kappa_p)$  QTAIM-DFA parameters, whereas  $\rho_b(\mathbf{r}_c)$ ,  $\nabla_2\rho_b(\mathbf{r}_c)$ ,  $G_b(\mathbf{r}_c)$ ,  $V_b(\mathbf{r}_c)$ ,  $H_b(\mathbf{r}_c)$  and  $H_b(\mathbf{r}_c) - V_b(\mathbf{r}_c)/2$  belong to QTAIM functions.  $k_b(\mathbf{r}_c)$ , defined by Equation (S7), is an QTAIM function but it will be treated as if it were an QTAIM-DFA parameter, if suitable.

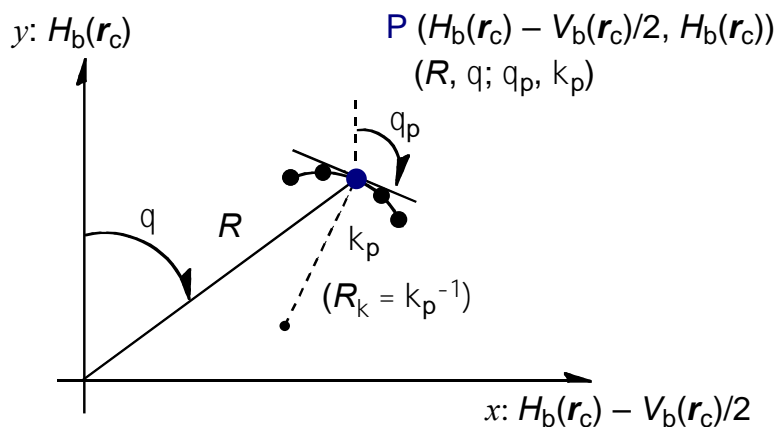

**Figure S1.** Polar  $(R, \theta)$  coordinate representation of  $H_b(\mathbf{r}_c)$  versus  $H_b(\mathbf{r}_c) - V_b(\mathbf{r}_c)/2$ , with  $(\theta_p, \kappa_p)$  parameters.

$$R = (x^2 + y^2)^{1/2} \quad (\text{S3})$$

$$\theta = 90^\circ - \tan^{-1}(y/x) \quad (\text{S4})$$

$$\theta_p = 90^\circ - \tan^{-1}(dy/dx) \quad (\text{S5})$$

$$\kappa_p = |d^2y/dx^2| / [1 + (dy/dx)^2]^{3/2} \quad (\text{S6})$$

$$k_b(\mathbf{r}_c) = V_b(\mathbf{r}_c)/G_b(\mathbf{r}_c) \quad (\text{S7})$$

where  $(x, y) = (H_b(\mathbf{r}_c) - V_b(\mathbf{r}_c)/2, H_b(\mathbf{r}_c))$

## Criteria for classification of interactions: behavior of typical interactions elucidated by QTAIM-DFA

$H_b(r_c)$  are plotted versus  $H_b(r_c) - V_b(r_c)/2$  for typical interactions in vdW (van der Waals interactions), HBs (hydrogen bonds), CT-MCs (molecular complexes through charge transfer),  $X_3^-$  (trihalide ions), CT-TBPs (trigonal bipyramidal adducts through charge-transfer), Cov-w (weak covalent bonds) and Cov-s (strong covalent bonds).<sup>s4-s8</sup> Rough criteria are obtained by applying QTAIM-DFA, after the analysis of the plots for the typical interactions according to Equations (S3)–(S7). Scheme S3 shows the rough criteria, which are accomplished by the  $\theta$  and  $\theta_p$  values, together with the values of  $k_b(r_c)$ . The criteria will be employed to discuss the nature of interactions in question, as a reference.

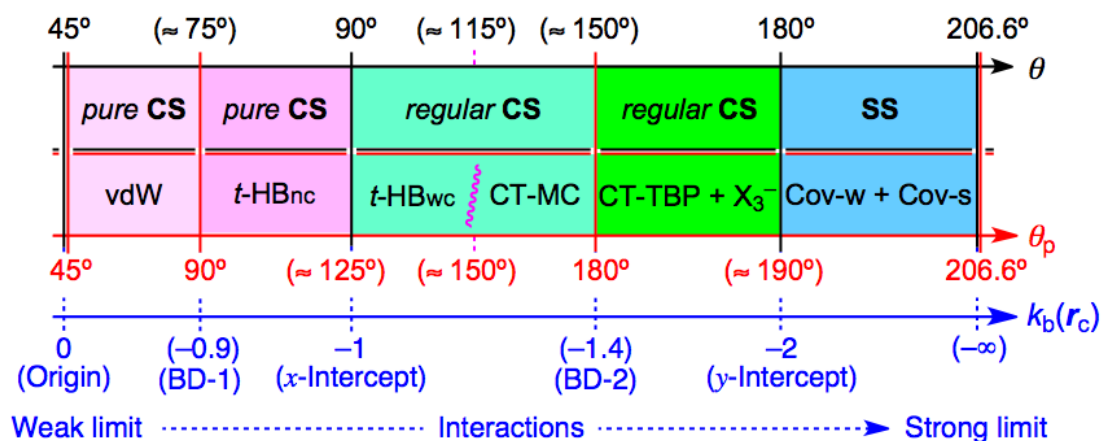

**Scheme S3.** Rough classification and characterization of interactions by  $\theta$  and  $\theta_p$ , together with  $k_b(r_c)$  ( $= V_b(r_c)/G_b(r_c)$ ).

## Characterization of interactions

The characterization of interactions is explained employing  $[1Cl-2Cl-3Cl]^-$ . The wide range of the perturbed structures were generated by partially optimizing  $r(2Cl-3Cl)$  in  $[1Cl-2Cl-3Cl]^-$ , assuming the  $C_{\infty v}$  symmetry, with  $r(1Cl-2Cl)$  being fixed in the wide range. The partial optimization method is called POM.<sup>s4b,s5</sup> The QTAIM functions, such as  $V_b(r_c)$ ,  $G_b(r_c)$ ,  $H_b(r_c)$ ,  $H_b(r_c) - V_b(r_c)/2$  are calculated at BCPs for the wide varieties of the perturbed structures of  $[1Cl-2Cl-3Cl]^-$ .  $H_b(r_c) - V_b(r_c)/2$  and  $H_b(r_c)$  are plotted versus the interaction distances  $r(1Cl-2Cl)$  in the perturbed structures of  $[1Cl-2Cl-3Cl]^-$ , in the wide range. Figure S2 shows the plots. Each plot is analyzed using a regression curve of the ninth function and the first derivative of each regression curve is obtained. As shown in Figure S2, the maximum value of  $H_b(r_c)$  ( $d(H_b(r_c))/dr = 0$ ) is defined as the borderline between vdW and t-HB interactions. Similarly, the maximum value of  $H_b(r_c) - V_b(r_c)/2$  ( $d(H_b(r_c) - V_b(r_c)/2)/dr = 0$ ) does to the borderline between CT-MC and CT-TBP. However, it seems difficult

to find a characteristic point corresponding to the borderline between *t*-HB and CT-MC in nature. Therefore, the borderline is tentatively given by  $\theta_p = 150^\circ$  based on the expectation from the experimental results, where  $\theta_p$  is defined by  $[90^\circ - \tan^{-1}[dH_b(\mathbf{r}_c)/d(H_b(\mathbf{r}_c) - V_b(\mathbf{r}_c)/2)]]$  in the plot of  $H_b(\mathbf{r}_c)$  versus  $H_b(\mathbf{r}_c) - V_b(\mathbf{r}_c)/2$ . The proposed classification and characterization of interactions, by means of the QTAIM functions of  $H_b(\mathbf{r}_c)$ ,  $H_b(\mathbf{r}_c) - V_b(\mathbf{r}_c)/2$ ,  $G_b(\mathbf{r}_c)$ , and/or  $V_b(\mathbf{r}_c)$ , are summarized in Table S1. The plot of  $H_b(\mathbf{r}_c) - V_b(\mathbf{r}_c)/2$  versus  $w$  in Figure S2 is essentially the same as that of  $\nabla_2\rho_b(\mathbf{r}_c)$  versus  $d(\text{H}---\text{F})$  in X-H---F-Y, presented by Espinosa and co-workers.<sup>s9</sup>

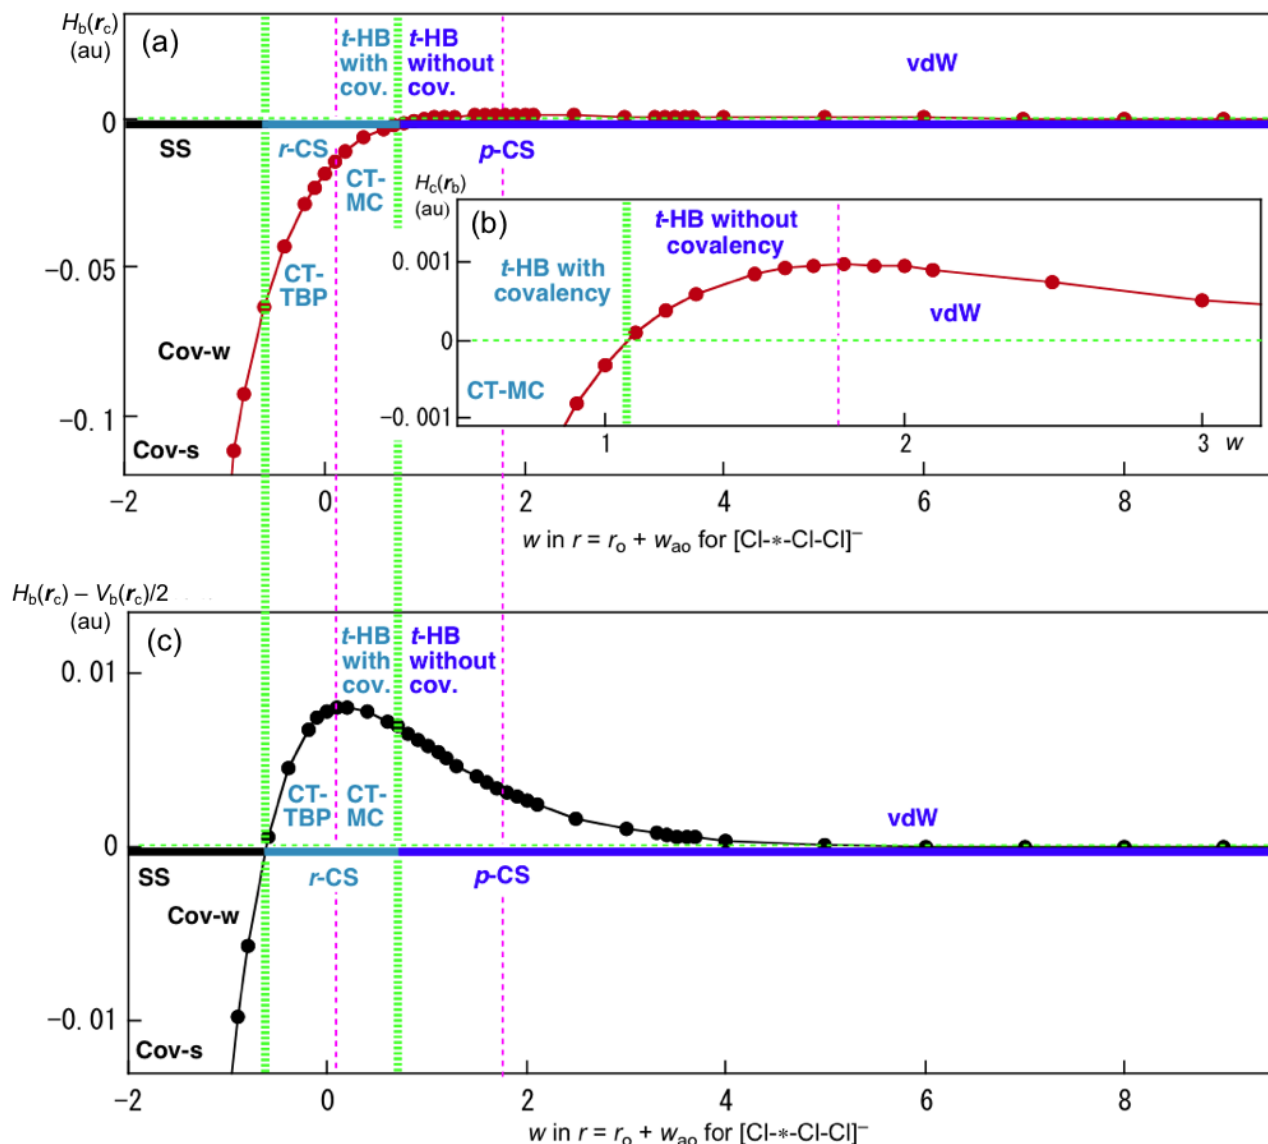

**Figure S2.** Plot of  $H_b(\mathbf{r}_c)$  versus  $w$  in  $r(1\text{Cl}-2\text{Cl}) = r_o(1\text{Cl}-2\text{Cl}) + w_{a0}$  for  $1\text{Cl}-2\text{Cl}-3\text{Cl}^-$  (a) with the magnified picture of (a) (b) and that of  $H_b(\mathbf{r}_c) - V_b(\mathbf{r}_c)/2$  versus  $w$  (c). Typical hydrogen bonds without covalency and typical hydrogen bonds with covalency are abbreviated as *t*-HB without cov. and *t*-HB with cov., respectively, whereas Cov-w and Cov-s stand for weak covalent bonds and strong covalent bonds, respectively.

**Table S1.** Proposed definitions for the classification and characterization of interactions by the signs  $H_b(\mathbf{r}_c)$  and  $H_b(\mathbf{r}_c) - V_b(\mathbf{r}_c)/2$  and their first derivatives, together with the tentatively proposed definitions by the characteristic points on the plots of  $H_b(\mathbf{r}_c)$  versus  $H_b(\mathbf{r}_c) - V_b(\mathbf{r}_c)/2$ . The tentatively proposed definitions are shown by italic. The requirements for the interactions are also shown.

| ChP/Interaction                           | Requirements by $H_b(\mathbf{r}_c)$ and $V_b(\mathbf{r}_c)$                                                                      | Requirements by $G_b(\mathbf{r}_c)$ and $V_b(\mathbf{r}_c)$                                                                  |
|-------------------------------------------|----------------------------------------------------------------------------------------------------------------------------------|------------------------------------------------------------------------------------------------------------------------------|
| Origin                                    | $H_b(\mathbf{r}_c) - V_b(\mathbf{r}_c)/2 = 0; H_b(\mathbf{r}_c) = 0$                                                             | $G_b(\mathbf{r}_c) = 0; V_b(\mathbf{r}_c) = 0$                                                                               |
| vdW                                       | $H_b(\mathbf{r}_c) > 0; dH_b(\mathbf{r}_c)/d(-r) > 0$                                                                            | $G_b(\mathbf{r}_c) > -V_b(\mathbf{r}_c); dG_b(\mathbf{r}_c)/d(-r) > -dV_b(\mathbf{r}_c)/d(-r)$                               |
| Borderline (BD-1)                         | $H_b(\mathbf{r}_c) > 0; dH_b(\mathbf{r}_c)/d(-r) = 0$                                                                            | $G_b(\mathbf{r}_c) > -V_b(\mathbf{r}_c); dG_b(\mathbf{r}_c)/d(-r) = -dV_b(\mathbf{r}_c)/d(-r)$                               |
| <i>t</i> -HB <sub>with no covalency</sub> | $H_b(\mathbf{r}_c) > 0; dH_b(\mathbf{r}_c)/d(-r) < 0$                                                                            | $G_b(\mathbf{r}_c) > -V_b(\mathbf{r}_c); dG_b(\mathbf{r}_c) < -dV_b(\mathbf{r}_c)$                                           |
| Borderline ( <i>x</i> -intercept)         | $H_b(\mathbf{r}_c) = 0$ ( $\theta_{pa} = 125^\circ$ )                                                                            | $G_b(\mathbf{r}_c) = -V_b(\mathbf{r}_c)$ ( $\theta_{pb} = 125^\circ$ )                                                       |
| <i>t</i> -HB <sub>with covalency</sub>    | $H_b(\mathbf{r}_c) < 0; (125^\circ <) \theta_{pa} < 150^\circ$                                                                   | $G_b(\mathbf{r}_c) < -V_b(\mathbf{r}_c); (125^\circ <) \theta_{pb} < 150^\circ$                                              |
| <i>Borderline (Tentative)</i>             | $\theta_{pa} = 150^\circ$                                                                                                        | $\theta_{pb} = 150^\circ$                                                                                                    |
| CT-MC                                     | $d(H_b(\mathbf{r}_c) - V_b(\mathbf{r}_c)/2)/d(-r) > 0;$<br>$150^\circ < \theta_{pa} < 180^\circ$                                 | $dG_b(\mathbf{r}_c) > dV_b(\mathbf{r}_c)/2;$<br>$150^\circ < \theta_{pb} < 180^\circ$                                        |
| Borderline (BD-2)                         | $d(H_b(\mathbf{r}_c) - V_b(\mathbf{r}_c)/2)/d(-r) = 0$<br>$(H_b(\mathbf{r}_c) - V_b(\mathbf{r}_c)/2 > 0; H_b(\mathbf{r}_c) < 0)$ | $2dG_b(\mathbf{r}_c)/d(-r) = -dV_b(\mathbf{r}_c)/d(-r)$<br>$(-V_b(\mathbf{r}_c)/2 < G_b(\mathbf{r}_c) < -V_b(\mathbf{r}_c))$ |
| CT-TBP with X <sub>3</sub> -              | $d(H_b(\mathbf{r}_c) - V_b(\mathbf{r}_c)/2)/d(-r) < 0$<br>$(H_b(\mathbf{r}_c) - V_b(\mathbf{r}_c)/2 > 0; H_b(\mathbf{r}_c) < 0)$ | $2dG_b(\mathbf{r}_c)/d(-r) < -dV_b(\mathbf{r}_c)/d(-r)$<br>$(-V_b(\mathbf{r}_c)/2 < G_b(\mathbf{r}_c) < -V_b(\mathbf{r}_c))$ |
| Borderline ( <i>y</i> -intercept)         | $H_b(\mathbf{r}_c) - V_b(\mathbf{r}_c)/2 = 0$ ( $H_b(\mathbf{r}_c) < 0$ )                                                        | $G_b(\mathbf{r}_c) = -V_b(\mathbf{r}_c)/2$ ( $G_b(\mathbf{r}_c) < -V_b(\mathbf{r}_c)$ )                                      |
| Cov-w                                     | $H_b(\mathbf{r}_c) - V_b(\mathbf{r}_c)/2 < 0; R_c < 0.15 \text{ au}$                                                             | $G_b(\mathbf{r}_c) < -V_b(\mathbf{r}_c)/2; R_c < 0.15 \text{ au}$                                                            |
| <i>Borderline (Tentative)</i>             | $R_c = 0.15 \text{ au}$                                                                                                          | $R_d = 0.15 \text{ au}$                                                                                                      |
| Cov-s                                     | $H_b(\mathbf{r}_c) - V_b(\mathbf{r}_c)/2 < 0; R_c > 0.15 \text{ au}$                                                             | $G_b(\mathbf{r}_c) < -V_b(\mathbf{r}_c)/2; R_d > 0.15 \text{ au}$                                                            |

<sup>a</sup>  $\theta_p = 90^\circ - \tan^{-1} [dH_b(\mathbf{r}_c)/d(H_b(\mathbf{r}_c) - V_b(\mathbf{r}_c)/2)]$ ,  $\theta_p = 125^\circ$  is tentatively given for  $\theta = 90^\circ$ , where  $\theta$  is defined by  $90^\circ - \tan^{-1}[H_b(\mathbf{r}_c)/(H_b(\mathbf{r}_c) - V_b(\mathbf{r}_c)/2)]$  with  $H_b(\mathbf{r}_c) = 0$ . <sup>b</sup>  $\theta_p = 90^\circ - \tan^{-1}[d(G_b(\mathbf{r}_c) + V_b(\mathbf{r}_c))/d(G_b(\mathbf{r}_c) + V_b(\mathbf{r}_c)/2)]$ ,  $\theta_p = 125^\circ$  is tentatively given for  $\theta = 90^\circ$ , where  $\theta$  is defined by  $90^\circ - \tan^{-1}[(G_b(\mathbf{r}_c) + V_b(\mathbf{r}_c))/(G_b(\mathbf{r}_c) + V_b(\mathbf{r}_c)/2)]$  with  $(G_b(\mathbf{r}_c) + V_b(\mathbf{r}_c)) = 0$ . <sup>c</sup>  $R = [(H_b(\mathbf{r}_c) - V_b(\mathbf{r}_c)/2)^2 + (H_b(\mathbf{r}_c))^2]^{1/2}$ . <sup>d</sup>  $R = [(G_b(\mathbf{r}_c) + V_b(\mathbf{r}_c)/2)^2 + (G_b(\mathbf{r}_c) + V_b(\mathbf{r}_c))^2]^{1/2}$ .

**Table S2.** Selected structural parameters,  $r(\text{G}, \text{E})$ ,  $r(\text{E}, \text{Y})$  and  $\angle\text{GEY}$ , of **1a**, **1b**, **2a**, **2b**, **3a**, **3b**, **4a**, **4b** and **5c** (**1–5**), together with the  $\Delta r(\text{G}, \text{E})$ ,  $\Delta r(\text{E}, \text{Y})$  and  $\Delta\angle\text{GEY}$  values, evaluated with MP2/BSS-A.<sup>a</sup> The  $\Delta r(\text{G}, \text{E})$ ,  $\Delta r(\text{E}, \text{Y})$  and  $\Delta\angle\text{GEY}$  values are defined in the footnotes of the Table.

| Species No | (G, E, Y)     | $r(\text{G}, \text{E})$<br>(Å) | $\Delta r(\text{G}, \text{E})^b$<br>(Å) | $r(\text{E}, \text{Y})$<br>(Å) | $\Delta r(\text{E}, \text{Y})^c$<br>(Å) | $\angle\text{GEY}$<br>(°) | $\Delta\angle\text{GEY}^d$<br>(°) |
|------------|---------------|--------------------------------|-----------------------------------------|--------------------------------|-----------------------------------------|---------------------------|-----------------------------------|
| <b>1a</b>  | (N, S, F)     | 2.1619                         | -1.188                                  | 1.7167                         | 0.037                                   | 175.20                    | -4.80                             |
| <b>1a</b>  | (N, S, Cl)    | 2.2218                         | -1.128                                  | 2.1630                         | 0.134                                   | 178.00                    | -2.00                             |
| <b>1a</b>  | (N, S, Br)    | 2.2425                         | -1.107                                  | 2.3147                         | 0.135                                   | 177.80                    | -2.20                             |
| <b>1a</b>  | (N, S, I)     | 2.3525                         | -0.998                                  | 2.4827                         | 0.113                                   | 175.73                    | -4.27                             |
| <b>1a</b>  | (N, S, SMe)   | 2.8599                         | -0.490                                  | 2.0538                         | -0.026                                  | 172.52                    | -7.48                             |
| <b>1a</b>  | (N, S, CMe)   | 2.9873                         | -0.363                                  | 1.8121                         | 0.000                                   | 174.14                    | -5.86                             |
| <b>1b</b>  | (N, Se, F)    | 2.2604                         | -1.190                                  | 1.8370                         | 0.027                                   | 170.58                    | -9.42                             |
| <b>1b</b>  | (N, Se, Cl)   | 2.2954                         | -1.155                                  | 2.2816                         | 0.122                                   | 174.00                    | -6.00                             |
| <b>1b</b>  | (N, Se, Br)   | 2.3128                         | -1.137                                  | 2.4284                         | 0.118                                   | 174.85                    | -5.15                             |
| <b>1b</b>  | (N, Se, I)    | 2.3700                         | -1.080                                  | 2.6143                         | 0.114                                   | 175.41                    | -4.59                             |
| <b>1b</b>  | (N, Se, SeMe) | 2.6873                         | -0.763                                  | 2.3351                         | -0.005                                  | 171.86                    | -8.14                             |
| <b>1b</b>  | (N, Se, CMe)  | 2.8849                         | -0.565                                  | 1.9522                         | 0.010                                   | 168.90                    | -11.10                            |
| <b>2a</b>  | (O, S, F)     | 2.4796                         | -0.840                                  | 1.6475                         | -0.033                                  | 176.37                    | -3.63                             |
| <b>2a</b>  | (O, S, Cl)    | 2.7094                         | -0.611                                  | 2.0453                         | 0.015                                   | 175.20                    | -4.80                             |
| <b>2a</b>  | (O, S, Br)    | 2.7564                         | -0.564                                  | 2.1950                         | 0.015                                   | 173.29                    | -6.71                             |
| <b>2a</b>  | (O, S, I)     | 2.8547                         | -0.465                                  | 2.3863                         | 0.016                                   | 169.18                    | -10.82                            |
| <b>2a</b>  | (O, S, SMe)   | 2.9638                         | -0.356                                  | 2.0437                         | -0.036                                  | 174.34                    | -5.67                             |
| <b>2a</b>  | (O, S, CMe)   | 3.1040                         | -0.216                                  | 1.8080                         | -0.004                                  | 176.46                    | -3.5                              |
| <b>2b</b>  | (O, Se, F)    | 2.4354                         | -0.985                                  | 1.7844                         | -0.026                                  | 171.20                    | -8.80                             |
| <b>2b</b>  | (O, Se, Cl)   | 2.5569                         | -0.863                                  | 2.1884                         | 0.028                                   | 174.11                    | -5.89                             |
| <b>2b</b>  | (O, Se, Br)   | 2.5980                         | -0.822                                  | 2.3322                         | 0.022                                   | 174.47                    | -5.53                             |
| <b>2b</b>  | (O, Se, I)    | 2.6947                         | -0.725                                  | 2.5195                         | 0.019                                   | 173.55                    | -6.45                             |
| <b>2b</b>  | (O, Se, SeMe) | 2.8787                         | -0.541                                  | 2.3086                         | -0.031                                  | 172.37                    | -7.63                             |
| <b>2b</b>  | (O, Se, CMe)  | 2.9614                         | -0.457                                  | 1.9450                         | 0.003                                   | 170.80                    | -9.20                             |
| <b>3a</b>  | (S, S, F)     | 2.7254                         | -0.875                                  | 1.6715                         | -0.009                                  | 176.31                    | -3.69                             |
| <b>3a</b>  | (S, S, Cl)    | 3.0214                         | -0.579                                  | 2.0612                         | 0.031                                   | 170.94                    | -9.06                             |
| <b>3a</b>  | (S, S, Br)    | 3.0535                         | -0.547                                  | 2.2112                         | 0.031                                   | 168.98                    | -11.02                            |
| <b>3a</b>  | (S, S, I)     | 3.1736                         | -0.426                                  | 2.3978                         | 0.028                                   | 163.26                    | -16.74                            |
| <b>3a</b>  | (S, S, SMe)   | 3.3364                         | -0.264                                  | 2.0488                         | -0.031                                  | 169.34                    | -10.66                            |
| <b>3a</b>  | (S, S, CMe)   | 3.4257                         | -0.174                                  | 1.8094                         | -0.003                                  | 176.13                    | -3.87                             |
| <b>3b</b>  | (S, Se, F)    | 2.6507                         | -1.049                                  | 1.8195                         | 0.010                                   | 172.64                    | -7.36                             |
| <b>3b</b>  | (S, Se, Cl)   | 2.7802                         | -0.920                                  | 2.2325                         | 0.072                                   | 173.59                    | -6.41                             |
| <b>3b</b>  | (S, Se, Br)   | 2.8216                         | -0.878                                  | 2.3745                         | 0.065                                   | 173.16                    | -6.84                             |
| <b>3b</b>  | (S, Se, I)    | 2.9507                         | -0.749                                  | 2.5494                         | 0.049                                   | 170.72                    | -9.28                             |
| <b>3b</b>  | (S, Se, SeMe) | 3.2512                         | -0.449                                  | 2.3169                         | -0.023                                  | 167.40                    | -12.60                            |
| <b>3b</b>  | (S, Se, CMe)  | 3.3731                         | -0.327                                  | 1.9494                         | 0.007                                   | 168.10                    | -11.90                            |
| <b>4a</b>  | (Se, S, F)    | 2.8493                         | -0.851                                  | 1.6728                         | -0.007                                  | 175.40                    | -4.60                             |
| <b>4a</b>  | (Se, S, Cl)   | 3.1043                         | -0.596                                  | 2.0660                         | 0.036                                   | 170.49                    | -9.51                             |
| <b>4a</b>  | (Se, S, Br)   | 3.1244                         | -0.576                                  | 2.2169                         | 0.037                                   | 168.80                    | -11.20                            |
| <b>4a</b>  | (Se, S, I)    | 3.2417                         | -0.458                                  | 2.4018                         | 0.032                                   | 163.29                    | -16.71                            |
| <b>4a</b>  | (Se, S, SMe)  | 3.4323                         | -0.268                                  | 2.0500                         | -0.030                                  | 168.87                    | -11.13                            |
| <b>4a</b>  | (Se, S, CMe)  | 3.5507                         | -0.149                                  | 1.8080                         | -0.004                                  | 171.83                    | -8.17                             |

<sup>a</sup> See text for BSS-A. <sup>b</sup>  $\Delta r(\text{G}, \text{E}) = r(\text{G}, \text{E}) - (r_{\text{vdW}}(\text{G}) + r_{\text{vdW}}(\text{E}))$  (A. Bondi, *J. Phys. Chem.* **1964**, *68*, 441–451). <sup>c</sup>  $\Delta r(\text{E}, \text{Y}) = r(\text{E}, \text{Y}) - (r_{\text{co}}(\text{E}) + r_{\text{co}}(\text{Y}))$  (P. Pyykkö, M. Atsumi, *Chem. Eur. J.* **2009**, *15*, 186 – 197). <sup>d</sup>  $\Delta\angle\text{GEY} = \angle\text{GEY} - 180.00^\circ$ .



Table S2 (continued)

| Species No | (G, E, Y)                  | $r(\text{G}, \text{E})$<br>(Å) | $\Delta r(\text{G}, \text{E})^b$<br>(Å) | $r(\text{E}, \text{Y})$<br>(Å) | $\Delta r(\text{E}, \text{Y})^c$<br>(Å) | $\angle \text{GEY}$<br>(°) | $\Delta \angle \text{GEY}^d$<br>(°) |
|------------|----------------------------|--------------------------------|-----------------------------------------|--------------------------------|-----------------------------------------|----------------------------|-------------------------------------|
| 4b         | (Se, Se, F)                | 2.7512                         | -1.049                                  | 1.8249                         | 0.015                                   | 172.73                     | -7.27                               |
| 4b         | (Se, Se, Cl)               | 2.8662                         | -0.934                                  | 2.2427                         | 0.083                                   | 172.87                     | -7.14                               |
| 4b         | (Se, Se, Br)               | 2.8995                         | -0.900                                  | 2.3861                         | 0.076                                   | 172.45                     | -7.56                               |
| 4b         | (Se, Se, I)                | 3.0175                         | -0.783                                  | 2.5601                         | 0.060                                   | 170.29                     | -9.71                               |
| 4b         | (Se, Se, SeMe)             | 3.3569                         | -0.443                                  | 2.3132                         | -0.027                                  | 175.11                     | -4.89                               |
| 4b         | (Se, Se, C <sub>Me</sub> ) | 3.4859                         | -0.314                                  | 1.9502                         | 0.008                                   | 167.93                     | -12.07                              |
| 5c         | (Te, Te, F)                | 3.0154                         | -1.105                                  | 1.9858                         | -0.024                                  | 164.79                     | -15.21                              |
| 5c         | (Te, Te, Cl)               | 3.0880                         | -1.032                                  | 2.4312                         | 0.071                                   | 166.33                     | -13.67                              |
| 5c         | (Te, Te, Br)               | 3.1128                         | -1.007                                  | 2.5791                         | 0.069                                   | 166.55                     | -13.45                              |
| 5c         | (Te, Te, I)                | 3.1820                         | -0.938                                  | 2.7777                         | 0.078                                   | 166.17                     | -13.83                              |
| 5c         | (Te, Te, TeMe)             | 3.6034                         | -0.517                                  | 2.6968                         | -0.043                                  | 162.34                     | -17.66                              |
| 5c         | (Te, Te, C <sub>Me</sub> ) | 3.7115                         | -0.409                                  | 2.1511                         | 0.009                                   | 160.85                     | -19.15                              |

<sup>a</sup> See text for BSS-A. <sup>b</sup>  $\Delta r(\text{G}, \text{E}) = r(\text{G}, \text{E}) - (r_{\text{vdW}}(\text{G}) + r_{\text{vdW}}(\text{E}))$  (A. Bondi, *J. Phys. Chem.* **1964**, *68*, 441–451). <sup>c</sup>  $\Delta r(\text{E}, \text{Y}) = r(\text{E}, \text{Y}) - (r_{\text{co}}(\text{E}) + r_{\text{co}}(\text{Y}))$  (P. Pyykkö, M. Atsumi, *Chem. Eur. J.* **2009**, *15*, 186–197). <sup>d</sup>  $\Delta \angle \text{GEY} = \angle \text{GEY} - 180.00^\circ$ .

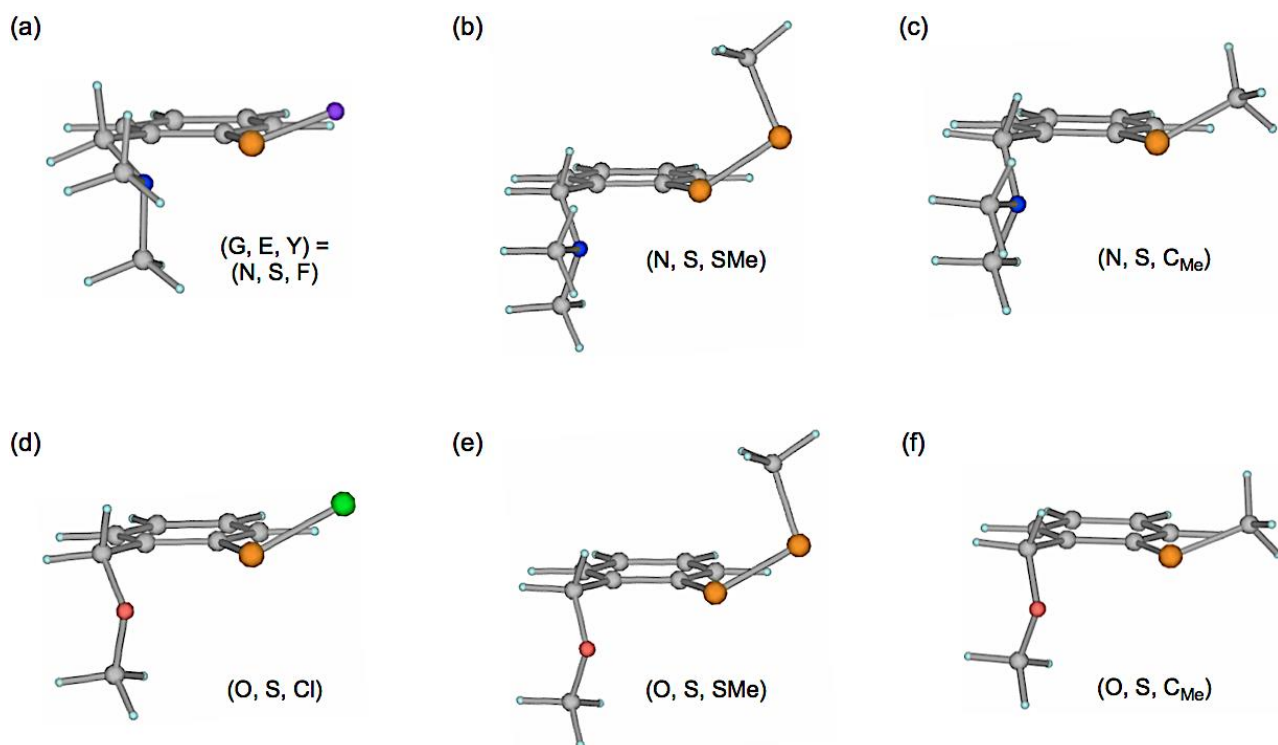

**Figure S3.** Optimized structures in **1a** (a–c) and **2a** (d–f) calculated with MP2/BSS-A.

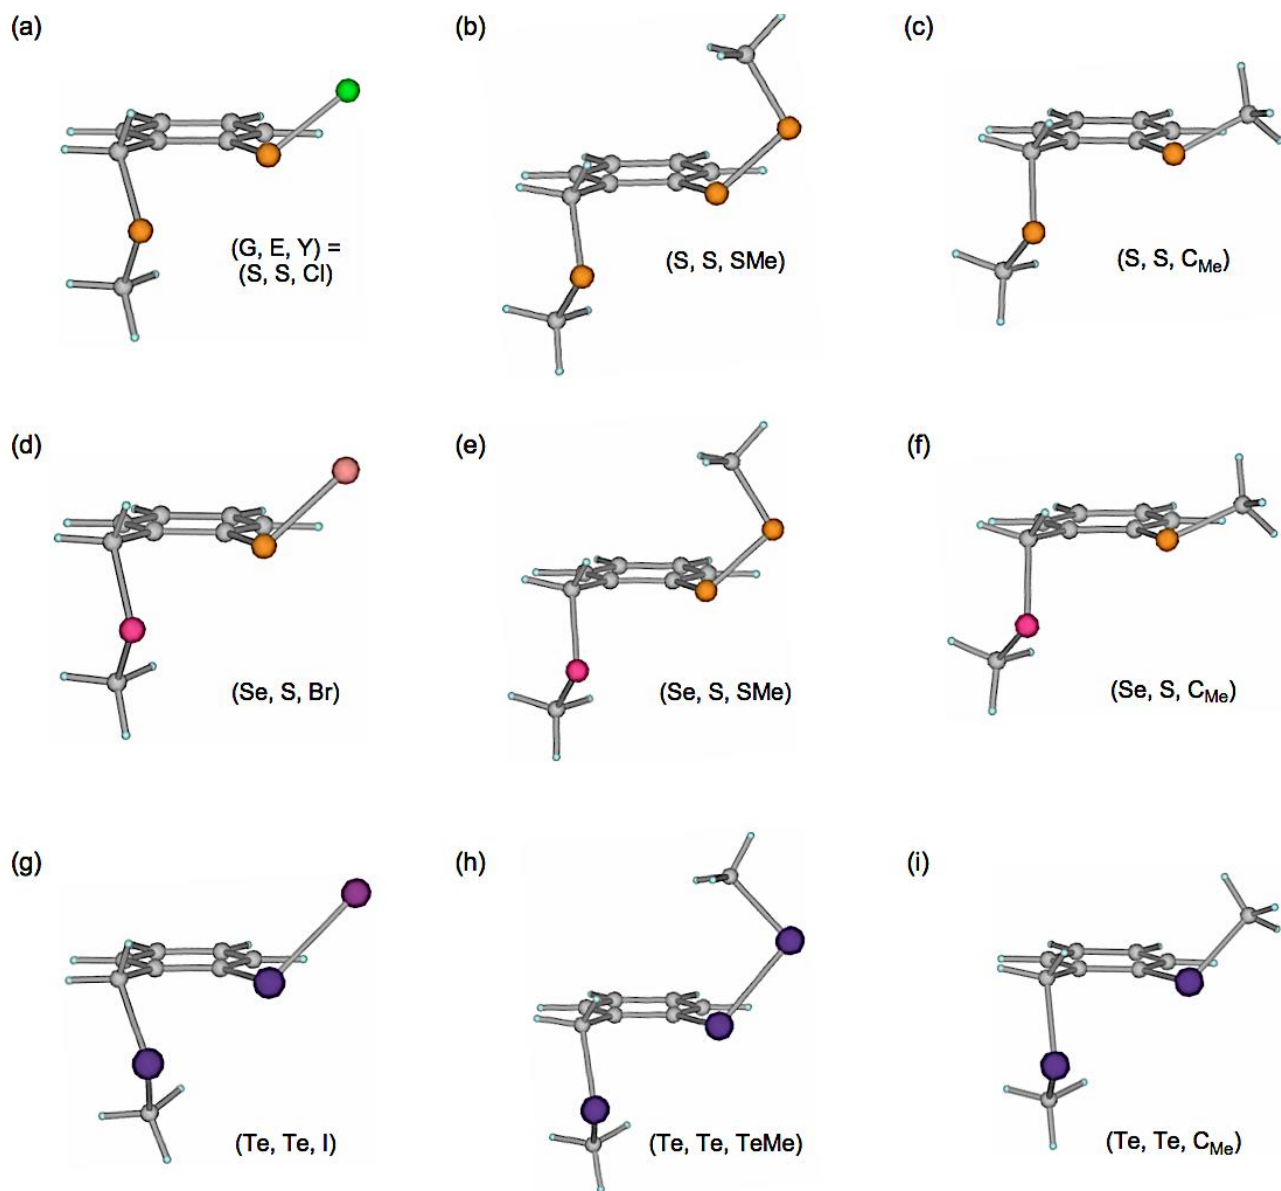

**Figure S4.** Optimized structures in **3a** (a–c), **4a** (d–f) and **5c** (g–i) calculated with MP2/BSS-A.

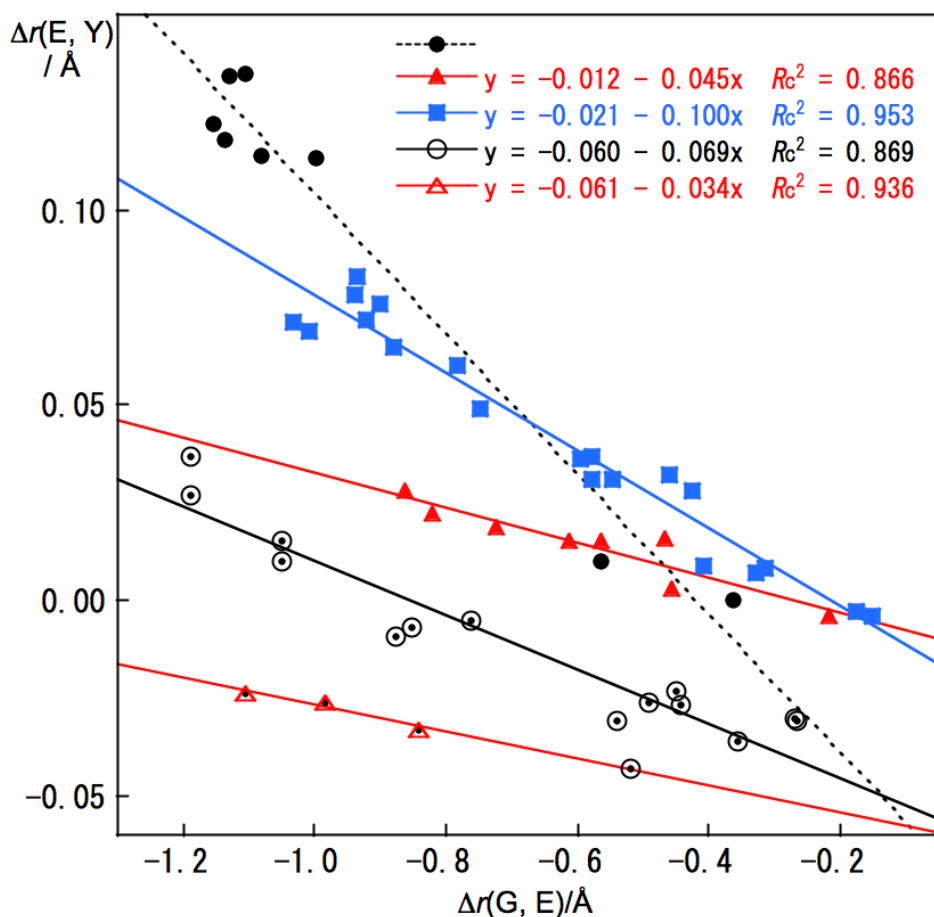

**Figure S5.** Plots of  $\Delta r(E, Y)$  versus  $\Delta r(G, E)$ , separately by **1** (●), **2** (▲) and **3–5** (■), although data for  $Y = F$  and EMe in **1–5** being omitted from the correlations, which were plotted separately. The data for  $Y = F$  and EMe in **1–5**, are analyzed as two correlations for  $Y = F$  in **2a**, **2b** and **3c** (△) and for  $Y = F$  and EMe in **1–5**, other than the data for  $Y = F$  in **2a**, **2b** and **3c** (○). In the case of **1** (●), data are separated widely as two groups (the upper left group of six points and two points at the lower right part). Therefore, the data may not be appropriate for the fitting from the statistic point of view. Nevertheless, the plot for **1** is tentatively shown by the dotted line, where the correlation is not given.

**Table S3.** Lengths of bond paths (BPs:  $r_{BP}$ ) and the corresponding straight-line distances ( $R_{SL}$ ), corresponding to the intramolecular G\*-E interactions in G\*-E\*-Y  $\sigma(3c-4e)$  of **1-5**, evaluated with MP2/BSS-A, together with the differences between the two ( $\Delta r_{BP} = r_{BP} - R_{SL}$ )<sup>a</sup>

| Species<br>(symm) | G*-E          | $r_{BP}$<br>(Å) | $R_{SL}$<br>(Å) | $\Delta r_{BP}^b$<br>(Å) |          |
|-------------------|---------------|-----------------|-----------------|--------------------------|----------|
| <b>1a</b>         | (N, S, F)     | N*-S            | 2.1678          | 2.1619                   | 0.0059   |
| <b>1a</b>         | (N, S, Cl)    | N*-S            | 2.2278          | 2.2218                   | 0.0060   |
| <b>1a</b>         | (N, S, Br)    | N*-S            | 2.2485          | 2.2425                   | 0.0060   |
| <b>1a</b>         | (N, S, I)     | N*-S            | 2.3595          | 2.3525                   | 0.0070   |
| <b>1a</b>         | (N, S, SMe)   | N*-S            | 2.8737          | 2.8599                   | 0.0138   |
| <b>1a</b>         | (N, S, CMe)   | N*-S            | 2.9985          | 2.9873                   | 0.0112   |
| <b>1b</b>         | (N, Se, F)    | N*-Se           | 2.2618          | 2.2604                   | 0.0013   |
| <b>1b</b>         | (N, Se, Cl)   | N*-Se           | 2.2968          | 2.2954                   | 0.0014   |
| <b>1b</b>         | (N, Se, Br)   | N*-Se           | 2.3143          | 2.3128                   | 0.0015   |
| <b>1b</b>         | (N, Se, I)    | N*-Se           | 2.3718          | 2.3700                   | 0.0018   |
| <b>1b</b>         | (N, Se, SeMe) | N*-Se           | 2.6911          | 2.6873                   | 0.0038   |
| <b>1b</b>         | (N, Se, CMe)  | N*-Se           | 2.8900          | 2.8849                   | 0.0050   |
| <b>2a</b>         | (O, S, F)     | O*-S            | 2.4911          | 2.4796                   | 0.0116   |
| <b>2a</b>         | (O, S, Cl)    | O*-S            | 2.7221          | 2.7094                   | 0.0127   |
| <b>2a</b>         | (O, S, Br)    | O*-S            | 2.7692          | 2.7564                   | 0.0128   |
| <b>2a</b>         | (O, S, I)     | O*-S            | 2.8683          | 2.8547                   | 0.0136   |
| <b>2a</b>         | (O, S, SMe)   | O*-S            | 2.9752          | 2.9638                   | 0.0114   |
| <b>2a</b>         | (O, S, CMe)   | O*-S            | 3.0226          | 3.0140                   | 0.0086   |
| <b>2b</b>         | (O, Se, F)    | O*-Se           | 2.4373          | 2.4354                   | 0.0019   |
| <b>2b</b>         | (O, Se, Cl)   | O*-Se           | 2.5592          | 2.5569                   | 0.0023   |
| <b>2b</b>         | (O, Se, Br)   | O*-Se           | 2.6005          | 2.5980                   | 0.0025   |
| <b>2b</b>         | (O, Se, I)    | O*-Se           | 2.6978          | 2.6947                   | 0.0031   |
| <b>2b</b>         | (O, Se, SeMe) | O*-Se           | 2.8820          | 2.8787                   | 0.0033   |
| <b>2b</b>         | (O, Se, CMe)  | O*-Se           | 2.9646          | 2.9614                   | 0.0032   |
| <b>3a</b>         | (S, S, F)     | S*-S            | 2.7393          | 2.7254                   | 0.0139   |
| <b>3a</b>         | (S, S, Cl)    | S*-S            | 3.0421          | 3.0214                   | 0.0207   |
| <b>3a</b>         | (S, S, Br)    | S*-S            | 3.0737          | 3.0535                   | 0.0202   |
| <b>3a</b>         | (S, S, I)     | S*-S            | 3.1953          | 3.1736                   | 0.0217   |
| <b>3a</b>         | (S, S, SMe)   | S*-S            | 3.3551          | 3.3364                   | 0.0187   |
| <b>3a</b>         | (S, S, CMe)   | S*-S            | 3.4392          | 3.4257                   | 0.0136   |
| <b>3b</b>         | (S, Se, F)    | S*-Se           | 2.6535          | 2.6507                   | 0.0028   |
| <b>3b</b>         | (S, Se, Cl)   | S*-Se           | 2.7851          | 2.7802                   | 0.0049   |
| <b>3b</b>         | (S, Se, Br)   | S*-Se           | 2.8272          | 2.8216                   | 0.0056   |
| <b>3b</b>         | (S, Se, I)    | S*-Se           | 2.9580          | 2.9507                   | 0.0073   |
| <b>3b</b>         | (S, Se, SeMe) | S*-Se           | 3.2611          | 3.2512                   | 0.0100   |
| <b>3b</b>         | (S, Se, CMe)  | S*-Se           | 3.3825          | 3.3731                   | 0.0094   |
| <b>4a</b>         | (Se, S, F)    | Se*-S           | 2.8637          | 2.8493                   | 0.0144   |
| <b>4a</b>         | (Se, S, Cl)   | Se*-S           | 3.1228          | 3.1043                   | 0.0185   |
| <b>4a</b>         | (Se, S, Br)   | Se*-S           | 3.1421          | 3.1244                   | 0.0177   |
| <b>4a</b>         | (Se, S, I)    | Se*-S           | 3.2601          | 3.2417                   | 0.0184   |
| <b>4a</b>         | (Se, S, SMe)  | Se*-S           | 3.4482          | 3.4323                   | 0.0159   |
| <b>4a</b>         | (Se, S, CMe)  | Se*-S           | <i>c</i>        | 3.5507                   | <i>c</i> |

<sup>a</sup> See text for BSS-A. <sup>b</sup>  $\Delta r_{BP} = r_{BP} - R_{SL}$ . <sup>c</sup> The bond path corresponding to the interaction being not detected.

Table S3 (continued)

| Species<br>(symm)        | G-*-E   | $r_{BP}$<br>(Å) | $R_{SL}$<br>(Å) | $\Delta r_{BP}^b$<br>(Å) |
|--------------------------|---------|-----------------|-----------------|--------------------------|
| <b>4b</b> (Se, Se, F)    | Se-*-Se | 2.7538          | 2.7512          | 0.0026                   |
| <b>4b</b> (Se, Se, Cl)   | Se-*-Se | 2.8703          | 2.8662          | 0.0041                   |
| <b>4b</b> (Se, Se, Br)   | Se-*-Se | 2.9040          | 2.8995          | 0.0045                   |
| <b>4b</b> (Se, Se, I)    | Se-*-Se | 3.0231          | 3.0175          | 0.0057                   |
| <b>4b</b> (Se, Se, SeMe) | Se-*-Se | 3.3541          | 3.3468          | 0.0072                   |
| <b>4b</b> (Se, Se, CMe)  | Se-*-Se | 3.4918          | 3.4859          | 0.0059                   |
| <b>5c</b> (Te, Te, F)    | Te-*-Te | 3.0180          | 3.0154          | 0.0025                   |
| <b>5c</b> (Te, Te, Cl)   | Te-*-Te | 3.0915          | 3.0880          | 0.0036                   |
| <b>5c</b> (Te, Te, Br)   | Te-*-Te | 3.1167          | 3.1128          | 0.0039                   |
| <b>5c</b> (Te, Te, I)    | Te-*-Te | 3.1868          | 3.1820          | 0.0048                   |
| <b>5c</b> (Te, Te, TeMe) | Te-*-Te | 3.6115          | 3.6034          | 0.0081                   |
| <b>5c</b> (Te, Te, CMe)  | Te-*-Te | 3.7190          | 3.7115          | 0.0075                   |

<sup>a</sup> See text for BSS-A. <sup>b</sup>  $\Delta r_{BP} = r_{BP} - R_{SL}$ . <sup>c</sup> The bond path corresponding to the interaction being not detected.

**Table S4.** The QTAIM functions, QTAIM-DFA parameters and the  $C_{ii}$  values for the E\*-Y bonds in G---E-Y  $\sigma(3c-4e)$  of **1–5**, calculated with MP2/BSS-A<sub>a</sub>

| Species: E*-Y<br>(No) | $\rho_b(\mathbf{r}_c)$<br>(au) | $c\nabla^2\rho_b(\mathbf{r}_c)$ <sup>b</sup><br>(au) | $H_b(\mathbf{r}_c)$<br>(au) | $k_b(\mathbf{r}_c)$ <sup>c</sup> | $R_d$<br>(au) | $\theta_e$<br>(°) | $C_{iif}$<br>(Å mdyn <sup>-1</sup> ) | $\theta_{pg}$<br>(°) | $\kappa_{ph}$<br>(au <sup>-1</sup> ) |
|-----------------------|--------------------------------|------------------------------------------------------|-----------------------------|----------------------------------|---------------|-------------------|--------------------------------------|----------------------|--------------------------------------|
| <b>1a:</b> NS*-F      | 0.1578                         | -0.0081                                              | -0.1554                     | -2.116                           | 0.1556        | 183.0             | 0.434                                | 175.2                | 11.5                                 |
| <b>1a:</b> NS*-Cl     | 0.1141                         | -0.0004                                              | -0.0536                     | -2.016                           | 0.0536        | 180.5             | 0.863                                | 195.6                | 1.8                                  |
| <b>1a:</b> NS*-Br     | 0.0979                         | 0.0022                                               | -0.0374                     | -1.896                           | 0.0375        | 176.7             | 0.933                                | 193.9                | 3.5                                  |
| <b>1a:</b> NS*-I      | 0.0873                         | -0.0002                                              | -0.0340                     | -2.010                           | 0.0340        | 180.3             | 1.170                                | 192.8                | 0.7                                  |
| <b>1b:</b> NSe*-F     | 0.1315                         | 0.0351                                               | -0.0752                     | -1.517                           | 0.0830        | 155.0             | 0.407                                | 146.9                | 5.9                                  |
| <b>1b:</b> NSe*-Cl    | 0.0955                         | 0.0038                                               | -0.0415                     | -1.844                           | 0.0417        | 174.7             | 0.731                                | 187.3                | 1.2                                  |
| <b>1b:</b> NSe*-Br    | 0.0844                         | 0.0036                                               | -0.0305                     | -1.809                           | 0.0307        | 173.3             | 0.791                                | 189.5                | 3.5                                  |
| <b>1b:</b> NSe*-I     | 0.0753                         | 0.0012                                               | -0.0259                     | -1.914                           | 0.0260        | 177.3             | 0.897                                | 191.7                | 3.5                                  |
| <b>2a:</b> OS*-F      | 0.1770                         | 0.0103                                               | -0.1961                     | -1.905                           | 0.1964        | 177.0             | 0.270                                | 136.3                | 18.4                                 |
| <b>2a:</b> OS*-Cl     | 0.1441                         | -0.0125                                              | -0.0881                     | -2.396                           | 0.0890        | 188.1             | 0.388                                | 196.4                | 0.3                                  |
| <b>2a:</b> OS*-Br     | 0.1228                         | -0.0057                                              | -0.0608                     | -2.229                           | 0.0611        | 185.3             | 0.434                                | 195.2                | 1.0                                  |
| <b>2a:</b> OS*-I      | 0.1022                         | -0.0033                                              | -0.0482                     | -2.158                           | 0.0483        | 183.9             | 0.483                                | 187.9                | 4.8                                  |
| <b>2b:</b> OSe*-F     | 0.1466                         | 0.0450                                               | -0.0913                     | -1.503                           | 0.1018        | 153.7             | 0.297                                | 141.8                | 3.1                                  |
| <b>2b:</b> OSe*-Cl    | 0.1142                         | -0.0004                                              | -0.0603                     | -2.015                           | 0.0603        | 180.4             | 0.457                                | 184.4                | 7.6                                  |
| <b>2b:</b> OSe*-Br    | 0.1010                         | -0.0008                                              | -0.0448                     | -2.039                           | 0.0448        | 181.1             | 0.503                                | 190.8                | 0.3                                  |
| <b>2b:</b> OSe*-I     | 0.0885                         | -0.0021                                              | -0.0367                     | -2.132                           | 0.0367        | 183.3             | 0.552                                | 191.7                | 0.5                                  |
| <b>3a:</b> SS*-F      | 0.1705                         | -0.0006                                              | -0.1840                     | -2.006                           | 0.1840        | 180.2             | 0.390                                | 150.0                | 17.0                                 |
| <b>3a:</b> SS*-Cl     | 0.1394                         | -0.0103                                              | -0.0819                     | -2.336                           | 0.0825        | 187.2             | 0.467                                | 196.8                | 0.2                                  |
| <b>3a:</b> SS*-Br     | 0.1188                         | -0.0042                                              | -0.0567                     | -2.174                           | 0.0569        | 184.2             | 0.514                                | 195.5                | 0.9                                  |
| <b>3a:</b> SS*-I      | 0.1000                         | -0.0029                                              | -0.0460                     | -2.144                           | 0.0461        | 183.6             | 0.527                                | 188.7                | 4.6                                  |
| <b>3a:</b> SS*-SMe    | 0.1514                         | -0.0184                                              | -0.0931                     | -2.652                           | 0.0949        | 191.2             | 0.403                                | 197.5                | 0.2                                  |
| <b>3a:</b> SS*-CMe    | 0.1812                         | -0.0359                                              | -0.1255                     | -3.335                           | 0.1305        | 196.0             | 0.338                                | 199.7                | 0.2                                  |
| <b>3b:</b> SeS*-F     | 0.1367                         | 0.0374                                               | -0.0805                     | -1.518                           | 0.0888        | 155.1             | 0.400                                | 145.3                | 5.4                                  |
| <b>3b:</b> SSe*-Cl    | 0.1050                         | 0.0017                                               | -0.0503                     | -1.935                           | 0.0503        | 178.0             | 0.693                                | 188.0                | 3.6                                  |
| <b>3b:</b> SSe*-Br    | 0.0932                         | 0.0015                                               | -0.0374                     | -1.924                           | 0.0375        | 177.7             | 0.740                                | 191.9                | 0.9                                  |
| <b>3b:</b> SSe*-I     | 0.0838                         | -0.0008                                              | -0.0327                     | -2.052                           | 0.0327        | 181.4             | 0.732                                | 192.7                | 0.4                                  |
| <b>3b:</b> SSe*-SeMe  | 0.1073                         | -0.0056                                              | -0.0511                     | -2.283                           | 0.0515        | 186.3             | 0.510                                | 194.0                | 0.5                                  |
| <b>3b:</b> SSe*-CMe   | 0.1483                         | -0.0228                                              | -0.0967                     | -2.890                           | 0.0994        | 193.3             | 0.386                                | 193.2                | 3.1                                  |
| <b>4a:</b> SeS*-F     | 0.1701                         | -0.0013                                              | -0.1831                     | -2.014                           | 0.1831        | 180.4             | 0.402                                | 151.3                | 17.0                                 |
| <b>4a:</b> SeS*-Cl    | 0.1380                         | -0.0096                                              | -0.0801                     | -2.316                           | 0.0807        | 186.8             | 0.500                                | 196.9                | 0.2                                  |
| <b>4a:</b> SeS*-Br    | 0.1174                         | -0.0037                                              | -0.0553                     | -2.157                           | 0.0554        | 183.9             | 0.555                                | 195.7                | 0.7                                  |
| <b>4a:</b> SeS*-I     | 0.0993                         | -0.0027                                              | -0.0453                     | -2.138                           | 0.0454        | 183.5             | 0.553                                | 189.0                | 4.6                                  |
| <b>4a:</b> SeS*-SMe   | 0.1510                         | -0.0183                                              | -0.0926                     | -2.652                           | 0.0944        | 191.2             | 0.408                                | 197.5                | 0.2                                  |
| <b>4a:</b> SeS*-CMe   | 0.1815                         | -0.0359                                              | -0.1257                     | -3.331                           | 0.1308        | 195.9             | 0.345                                | 199.7                | 0.2                                  |

<sup>a</sup> See text for MP2/BSS-A. <sup>b</sup>  $c\nabla^2\rho_b(\mathbf{r}_c) = H_b(\mathbf{r}_c) - V_b(\mathbf{r}_c)/2$ , where  $c = \hbar^2/8m$ . <sup>c</sup>  $k_b(\mathbf{r}_c) = V_b(\mathbf{r}_c)/G_b(\mathbf{r}_c)$ . <sup>d</sup>  $R = (x^2 + y^2)^{1/2}$ , where  $(x, y) = (H_b(\mathbf{r}_c) - V_b(\mathbf{r}_c)/2, H_b(\mathbf{r}_c))$ . <sup>e</sup>  $\theta = 90^\circ - \tan^{-1}(y/x)$ . <sup>f</sup> Defined in eqn (3) in the text. <sup>g</sup>  $\theta_p = 90^\circ - \tan^{-1}(dy/dx)$ . <sup>h</sup>  $\kappa_p = |d^2y/dx^2|/[1 + (dy/dx)^2]^{3/2}$ .

Table S4 (continued)

| Species: E-*-Y<br>(No)     | $\rho_b(\mathbf{r}_c)$<br>(au) | $c\nabla_2\rho_b(\mathbf{r}_c)_b$<br>(au) | $H_b(\mathbf{r}_c)$<br>(au) | $k_b(\mathbf{r}_c)_c$ | $R_d$<br>(au) | $\theta_e$<br>( $^\circ$ ) | $C_{iif}$<br>( $\text{\AA mdyn}^{-1}$ ) | $\theta_{pg}$<br>( $^\circ$ ) | $\kappa_{ph}$<br>( $\text{au}^{-1}$ ) |
|----------------------------|--------------------------------|-------------------------------------------|-----------------------------|-----------------------|---------------|----------------------------|-----------------------------------------|-------------------------------|---------------------------------------|
| 4b: SeSe-*-F               | 0.1353                         | 0.0362                                    | -0.0790                     | -1.522                | 0.0869        | 155.4                      | 0.421                                   | 146.0                         | 5.9                                   |
| 4b: SeSe-*-Cl              | 0.1030                         | 0.0022                                    | -0.0481                     | -1.916                | 0.0482        | 177.4                      | 0.754                                   | 188.5                         | 3.2                                   |
| 4b: SeSe-*-Br              | 0.0911                         | 0.0021                                    | -0.0356                     | -1.896                | 0.0357        | 176.7                      | 0.808                                   | 192.0                         | 1.1                                   |
| 4b: SeSe-*-I               | 0.0822                         | -0.0004                                   | -0.0313                     | -2.026                | 0.0313        | 180.7                      | 0.807                                   | 192.9                         | 0.4                                   |
| 4b: SeSe-*-SeMe            | 0.1068                         | -0.0055                                   | -0.0507                     | -2.277                | 0.0510        | 186.2                      | 0.520                                   | 194.0                         | 0.5                                   |
| 4b: SeSe-*-C <sub>Me</sub> | 0.1480                         | -0.0226                                   | -0.0967                     | -2.876                | 0.0993        | 193.1                      | 0.389                                   | 193.2                         | 3.1                                   |
| 5c: TeTe-*-F               | 0.1069                         | 0.0561                                    | -0.0338                     | -1.231                | 0.0655        | 121.1                      | 0.397                                   | 115.8                         | 1.7                                   |
| 5c: TeTe-*-Cl              | 0.0805                         | 0.0093                                    | -0.0317                     | -1.629                | 0.0331        | 163.6                      | 0.729                                   | 154.9                         | 25.9                                  |
| 5c: TeTe-*-Br              | 0.073                          | 0.0044                                    | -0.0270                     | -1.753                | 0.0274        | 170.7                      | 0.820                                   | 173.0                         | 21.0                                  |
| 5c: TeTe-*-I               | 0.0662                         | 0.0006                                    | -0.0236                     | -1.949                | 0.0236        | 178.5                      | 0.967                                   | 188.3                         | 2.5                                   |
| 5c: TeTe-*-TeMe            | 0.0775                         | -0.0040                                   | -0.0330                     | -2.322                | 0.0332        | 186.9                      | 0.679                                   | 190.8                         | 2.3                                   |
| 5c: TeTe-*-C <sub>Me</sub> | 0.1142                         | -0.0007                                   | -0.0615                     | -2.023                | 0.0615        | 180.6                      | 0.451                                   | 163.8                         | 11.9                                  |

*a* See text for MP2/BSS-A. *b*  $c\nabla_2\rho_b(\mathbf{r}_c) = H_b(\mathbf{r}_c) - V_b(\mathbf{r}_c)/2$ , where  $c = \hbar^2/8m$ . *c*  $k_b(\mathbf{r}_c) = V_b(\mathbf{r}_c)/G_b(\mathbf{r}_c)$ . *d*  $R = (x^2 + y^2)^{1/2}$ , where  $(x, y) = (H_b(\mathbf{r}_c) - V_b(\mathbf{r}_c)/2, H_b(\mathbf{r}_c))$ . *e*  $\theta = 90^\circ - \tan^{-1}(y/x)$ . *f* Defined in eqn (3) in the text. *g*  $\theta_p = 90^\circ - \tan^{-1}(dy/dx)$ . *h*  $\kappa_p = |d^2y/dx^2|/[1 + (dy/dx)^2]^{3/2}$ .

 $\theta$  and  $\theta_p$  for I / $^\circ$ 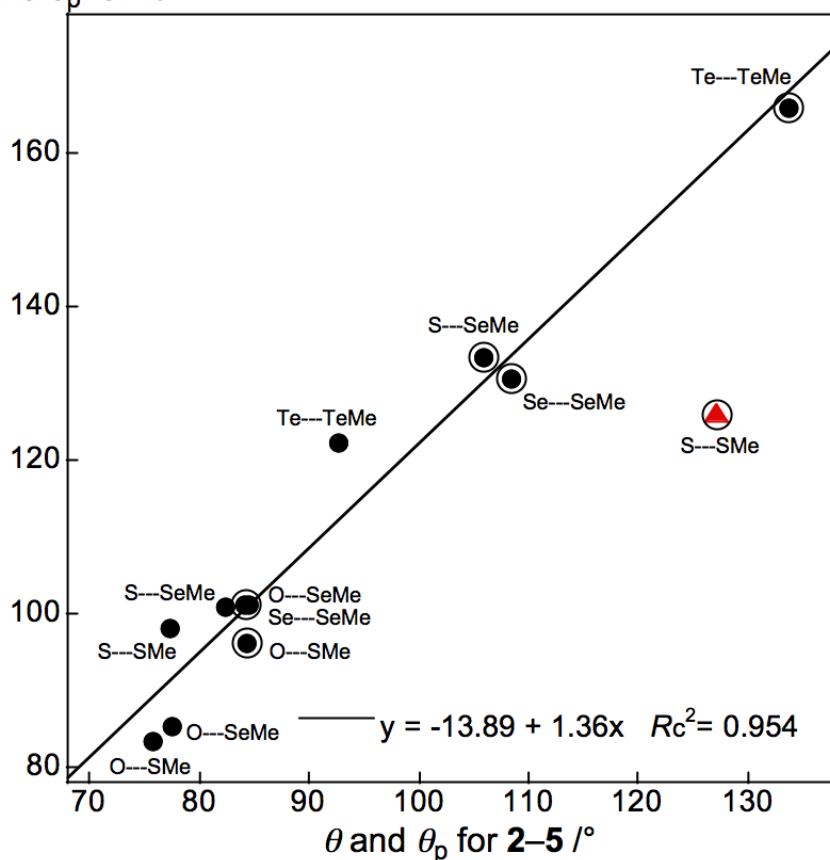

**Figure S6.** Plots of  $\theta$  (●) and  $\theta_p$  (○) of I versus the corresponding values of 2–5, although data for S---SMe being omitted from the correlations.

**Table S5.** NBO analysis for 1–5 evaluated with MP2/BSS-A

| Species<br>G*-EY      | NBO( <i>i</i> )→NBO( <i>j</i> ) | <i>E</i> (2) <sub><i>a</i></sub><br>(kcal mol <sup>-1</sup> ) | $\Delta E$ <sub><i>b</i></sub><br>(au) | <i>F</i> ( <i>i,j</i> ) <sub><i>c</i></sub><br>(au) | NBO( <i>i</i> )→NBO( <i>j</i> ) | <i>E</i> (2) <sub><i>a</i></sub><br>(kcal mol <sup>-1</sup> ) | $\Delta E$ <sub><i>b</i></sub><br>(au) | <i>F</i> ( <i>i,j</i> ) <sub><i>c</i></sub><br>(au) |
|-----------------------|---------------------------------|---------------------------------------------------------------|----------------------------------------|-----------------------------------------------------|---------------------------------|---------------------------------------------------------------|----------------------------------------|-----------------------------------------------------|
| <b>1a:</b> N*-SF      | ns(N)→np(S+)                    | 84.37                                                         | 0.50                                   | 0.198                                               | np(N)→np(S+)                    | <i>d</i>                                                      | <i>d</i>                               | <i>d</i>                                            |
| <b>1a:</b> N*-SCl     | ns(N)→σ*(S-Cl)                  | 48.32                                                         | 0.65                                   | 0.161                                               | np(N)→σ*(S-Cl)                  | <i>d</i>                                                      | <i>d</i>                               | <i>d</i>                                            |
| <b>1a:</b> N*-SBr     | ns(N)→σ*(S-Br)                  | 48.08                                                         | 0.60                                   | 0.154                                               | np(N)→σ*(S-Br)                  | <i>d</i>                                                      | <i>d</i>                               | <i>d</i>                                            |
| <b>1a:</b> N*-SI      | ns(N)→σ*(S-I)                   | 31.71                                                         | 0.56                                   | 0.121                                               | np(N)→σ*(S-I)                   | <i>d</i>                                                      | <i>d</i>                               | <i>d</i>                                            |
| <b>1a:</b> N*-SSMe    | ns(N)→σ*(S-S)                   | 3.56                                                          | 0.71                                   | 0.046                                               | np(N)→σ*(S-S)                   | <i>d</i>                                                      | <i>d</i>                               | <i>d</i>                                            |
| <b>1a:</b> N*-SCMe    | ns(N)→σ*(S-C)                   | 1.70                                                          | 0.85                                   | 0.035                                               | np(N)→σ*(S-C)                   | <i>d</i>                                                      | <i>d</i>                               | <i>d</i>                                            |
| <b>1b:</b> N*-SeF     | ns(N)→np(Se+)                   | 76.84                                                         | 0.52                                   | 0.189                                               | np(N)→np(Se+)                   | <i>d</i>                                                      | <i>d</i>                               | <i>d</i>                                            |
| <b>1b:</b> N*-SeCl    | ns(N)→σ*(Se-Cl)                 | 49.04                                                         | 0.65                                   | 0.162                                               | np(N)→σ*(Se-Cl)                 | <i>d</i>                                                      | <i>d</i>                               | <i>d</i>                                            |
| <b>1b:</b> N*-SeBr    | ns(N)→σ*(Se-Br)                 | 47.94                                                         | 0.61                                   | 0.155                                               | np(N)→σ*(Se-Br)                 | <i>d</i>                                                      | <i>d</i>                               | <i>d</i>                                            |
| <b>1b:</b> N*-SeI     | ns(N)→σ*(Se-I)                  | 39.27                                                         | 0.58                                   | 0.137                                               | np(N)→σ*(Se-I)                  | <i>d</i>                                                      | <i>d</i>                               | <i>d</i>                                            |
| <b>1b:</b> N*-SeSeMe  | ns(N)→σ*(Se-Se)                 | 10.42                                                         | 0.63                                   | 0.073                                               | np(N)→σ*(Se-Se)                 | <i>d</i>                                                      | <i>d</i>                               | <i>d</i>                                            |
| <b>1b:</b> N*-SeCMe   | ns(N)→σ*(Se-C)                  | 4.16                                                          | 0.77                                   | 0.052                                               | np(N)→σ*(Se-C)                  | <i>d</i>                                                      | <i>d</i>                               | <i>d</i>                                            |
| <b>2a:</b> O*-SF      | ns(O)→σ*(S-F)                   | 1.67                                                          | 1.09                                   | 0.038                                               | np(O)→σ*(S-F)                   | 9.78                                                          | 0.87                                   | 0.083                                               |
| <b>2a:</b> O*-SCl     | ns(O)→σ*(S-Cl)                  | 1.11                                                          | 1.00                                   | 0.030                                               | np(O)→σ*(S-Cl)                  | 4.31                                                          | 0.72                                   | 0.050                                               |
| <b>2a:</b> O*-SBr     | ns(O)→σ*(S-Br)                  | 1.03                                                          | 0.95                                   | 0.028                                               | np(O)→σ*(S-Br)                  | 3.76                                                          | 0.66                                   | 0.040                                               |
| <b>2a:</b> O*-SI      | ns(O)→σ*(S-I)                   | 0.78                                                          | 0.91                                   | 0.024                                               | np(O)→σ*(S-I)                   | 2.40                                                          | 0.61                                   | 0.035                                               |
| <b>2a:</b> O*-SSMe    | ns(O)→σ*(S-S)                   | <i>e</i>                                                      | <i>e</i>                               | <i>e</i>                                            | np(O)→σ*(S-S)                   | 1.15                                                          | 0.75                                   | 0.026                                               |
| <b>2a:</b> O*-SCMe    | ns(O)→σ*(S-C)                   | <i>e</i>                                                      | <i>e</i>                               | <i>e</i>                                            | np(O)→σ*(S-C)                   | 0.75                                                          | 0.89                                   | 0.023                                               |
| <b>2b:</b> O*-SeF     | ns(O)→np(Se+)                   | 2.48                                                          | 0.77                                   | 0.043                                               | np(O)→np(Se+)                   | 22.34                                                         | 0.62                                   | 0.114                                               |
| <b>2b:</b> O*-SeCl    | ns(O)→σ*(Se-Cl)                 | 2.13                                                          | 0.94                                   | 0.040                                               | np(O)→σ*(Se-Cl)                 | 11.65                                                         | 0.74                                   | 0.083                                               |
| <b>2b:</b> O*-SeBr    | ns(O)→σ*(Se-Br)                 | 2.08                                                          | 0.91                                   | 0.039                                               | np(O)→σ*(Se-Br)                 | 10.31                                                         | 0.69                                   | 0.076                                               |
| <b>2b:</b> O*-SeI     | ns(O)→σ*(Se-I)                  | 1.87                                                          | 0.89                                   | 0.036                                               | np(O)→σ*(Se-I)                  | 6.97                                                          | 0.63                                   | 0.060                                               |
| <b>2a:</b> O*-SeSeMe  | ns(O)→σ*(Se-Se)                 | 1.03                                                          | 0.97                                   | 0.028                                               | np(O)→σ*(Se-Se)                 | 2.60                                                          | 0.67                                   | 0.038                                               |
| <b>2a:</b> O*-SeCMe   | ns(O)→σ*(Se-C)                  | 0.67                                                          | 1.12                                   | 0.025                                               | np(O)→σ*(Se-C)                  | 1.49                                                          | 0.82                                   | 0.031                                               |
| <b>3a:</b> S*-SF      | ns(S)→np(S+)                    | 2.35                                                          | 0.74                                   | 0.043                                               | np(S)→np(S+)                    | 43.42                                                         | 0.38                                   | 0.125                                               |
| <b>3a:</b> S*-SCl     | ns(S)→σ*(S-Cl)                  | 0.95                                                          | 0.98                                   | 0.027                                               | np(S)→σ*(S-Cl)                  | 9.56                                                          | 0.56                                   | 0.066                                               |
| <b>3a:</b> S*-SBr     | ns(S)→σ*(S-Br)                  | 0.89                                                          | 0.93                                   | 0.026                                               | np(S)→σ*(S-Br)                  | 9.03                                                          | 0.51                                   | 0.061                                               |
| <b>3a:</b> S*-SI      | ns(S)→σ*(S-I)                   | 0.66                                                          | 0.90                                   | 0.022                                               | np(S)→σ*(S-I)                   | 5.40                                                          | 0.47                                   | 0.045                                               |
| <b>3a:</b> S*-SSMe    | ns(S)→σ*(S-S)                   | <i>e</i>                                                      | <i>e</i>                               | <i>e</i>                                            | np(S)→σ*(S-S)                   | 1.85                                                          | 0.60                                   | 0.030                                               |
| <b>3a:</b> S*-SCMe    | ns(S)→σ*(S-C)                   | <i>e</i>                                                      | <i>e</i>                               | <i>e</i>                                            | np(S)→σ*(S-C)                   | 0.85                                                          | 0.74                                   | 0.023                                               |
| <b>3b:</b> S*-SeF     | ns(S)→np(Se+)                   | 3.98                                                          | 0.72                                   | 0.055                                               | np(S)→np(Se+)                   | 84.08                                                         | 0.40                                   | 0.174                                               |
| <b>3b:</b> S*-SeCl    | ns(S)→σ*(Se-Cl)                 | 2.84                                                          | 0.90                                   | 0.046                                               | np(S)→σ*(Se-Cl)                 | 36.92                                                         | 0.55                                   | 0.129                                               |
| <b>3b:</b> S*-SeBr    | ns(S)→σ*(Se-Br)                 | 2.70                                                          | 0.88                                   | 0.045                                               | np(S)→σ*(Se-Br)                 | 33.34                                                         | 0.51                                   | 0.118                                               |
| <b>3b:</b> S*-SeI     | ns(S)→σ*(Se-I)                  | 2.07                                                          | 0.86                                   | 0.038                                               | np(S)→σ*(Se-I)                  | 21.03                                                         | 0.48                                   | 0.090                                               |
| <b>3b:</b> S*-SeSeMe  | ns(S)→σ*(Se-Se)                 | 0.81                                                          | 0.96                                   | 0.025                                               | np(S)→σ*(Se-Se)                 | 5.10                                                          | 0.52                                   | 0.047                                               |
| <b>3b:</b> S*-SeCMe   | ns(S)→σ*(Se-C)                  | 0.54                                                          | 1.11                                   | 0.022                                               | np(S)→σ*(Se-C)                  | 2.32                                                          | 0.67                                   | 0.036                                               |
| <b>4a:</b> Se*-SF     | ns(Se)→σ*(S-F)                  | 1.78                                                          | 1.10                                   | 0.040                                               | np(Se)→σ*(S-F)                  | 26.24                                                         | 0.65                                   | 0.118                                               |
| <b>4a:</b> Se*-SCl    | ns(Se)→σ*(S-Cl)                 | 0.80                                                          | 1.02                                   | 0.026                                               | np(Se)→σ*(S-Cl)                 | 11.04                                                         | 0.53                                   | 0.069                                               |
| <b>4a:</b> Se*-SBr    | ns(Se)→σ*(S-Br)                 | 0.79                                                          | 0.98                                   | 0.025                                               | np(Se)→σ*(S-Br)                 | 10.97                                                         | 0.49                                   | 0.066                                               |
| <b>4a:</b> Se*-SI     | ns(Se)→σ*(S-I)                  | 0.58                                                          | 0.95                                   | 0.021                                               | np(Se)→σ*(S-I)                  | 6.75                                                          | 0.45                                   | 0.049                                               |
| <b>4a:</b> Se*-SSMe   | ns(Se)→σ*(S-S)                  | <i>e</i>                                                      | <i>e</i>                               | <i>e</i>                                            | np(Se)→σ*(S-S)                  | 2.10                                                          | 0.58                                   | 0.031                                               |
| <b>4a:</b> Se*-SCMe   | ns(Se)→σ*(S-C)                  | <i>e</i>                                                      | <i>e</i>                               | <i>e</i>                                            | np(Se)→σ*(S-C)                  | 0.70                                                          | 0.72                                   | 0.020                                               |
| <b>4b:</b> Se*-SeF    | ns(Se)→np(Se+)                  | 4.03                                                          | 0.76                                   | 0.057                                               | np(Se)→np(Se+)                  | 92.76                                                         | 0.35                                   | 0.173                                               |
| <b>4b:</b> Se*-SeCl   | ns(Se)→σ*(Se-Cl)                | 2.91                                                          | 0.95                                   | 0.048                                               | np(Se)→σ*(Se-Cl)                | 42.05                                                         | 0.51                                   | 0.133                                               |
| <b>4b:</b> Se*-SeBr   | ns(Se)→σ*(Se-Br)                | 2.75                                                          | 0.92                                   | 0.046                                               | np(Se)→σ*(Se-Br)                | 39.25                                                         | 0.48                                   | 0.124                                               |
| <b>4b:</b> Se*-SeI    | ns(Se)→σ*(Se-I)                 | 2.05                                                          | 0.90                                   | 0.039                                               | np(Se)→σ*(Se-I)                 | 25.97                                                         | 0.45                                   | 0.097                                               |
| <b>4b:</b> Se*-SeSeMe | ns(Se)→σ*(Se-Se)                | 0.65                                                          | 1.01                                   | 0.023                                               | np(Se)→σ*(Se-Se)                | 5.90                                                          | 0.50                                   | 0.049                                               |
| <b>4b:</b> Se*-SeCMe  | ns(Se)→σ*(Se-C)                 | <i>e</i>                                                      | <i>e</i>                               | <i>e</i>                                            | np(Se)→σ*(Se-C)                 | 2.52                                                          | 0.65                                   | 0.036                                               |
| <b>5c:</b> Te*-TeF    | ns(Te)→np(Te+)                  | 4.56                                                          | 0.67                                   | 0.056                                               | np(Te)→np(Te+)                  | 125.85                                                        | 0.32                                   | 0.188                                               |
| <b>5c:</b> Te*-TeCl   | ns(Te)→σ*(Te-Cl)                | 3.43                                                          | 0.83                                   | 0.050                                               | np(Te)→σ*(Te-Cl)                | 60.71                                                         | 0.47                                   | 0.153                                               |
| <b>5c:</b> Te*-TeBr   | ns(Te)→σ*(Te-Br)                | 0.83                                                          | 1.38                                   | 0.030                                               | np(Te)→σ*(Te-Br)                | 58.03                                                         | 0.44                                   | 0.145                                               |
| <b>5c:</b> Te*-TeI    | ns(Te)→σ*(Te-I)                 | 3.00                                                          | 0.79                                   | 0.045                                               | np(Te)→σ*(Te-I)                 | 47.90                                                         | 0.42                                   | 0.128                                               |
| <b>5c:</b> Te*-TeTeMe | ns(Te)→σ*(Te-Te)                | 0.76                                                          | 0.85                                   | 0.023                                               | np(Te)→σ*(Te-Te)                | 9.76                                                          | 0.44                                   | 0.059                                               |
| <b>5c:</b> Te*-TeCMe  | ns(Te)→σ*(Te-C)                 | <i>e</i>                                                      | <i>e</i>                               | <i>e</i>                                            | np(Te)→σ*(Te-C)                 | 5.87                                                          | 0.56                                   | 0.052                                               |

*a* Second-order perturbation energy of the NBO analysis. *b*  $\Delta E = E(j) - E(i)$ . *c* The off-diagonal NBO Fock matrix element. See Eqn (5) in the text. *d* Not detected due to the only one ns(G): lone pair orbital of N (G = N) being characterized as ns(N). *e* Not printed, possibly because the evaluated *E*(2) was less than the threshold value of 0.5 kcal mol<sup>-1</sup>.



## References

- S1 (a) *Atoms in Molecules. A Quantum Theory*: eds. R. F. W. Bader, Oxford University Press, Oxford, UK, 1990; (b) C. F. Matta, R. J. Boyd, *An Introduction to the Quantum Theory of Atoms in Molecules in The Quantum Theory of Atoms in Molecules: From Solid State to DNA and Drug Design*: eds. C. F. Matta, R. J. Boyd, WILEY-VCH, Weinheim, Germany, 2007, Chapter 1.
- S2 (a) R. F. W. Bader, T. S. Slee, D. Cremer, E. Kraka, *J. Am. Chem. Soc.* **1983**, *105*, 5061–5068; (b) R. F. W. Bader, *Chem. Rev.* **1991**, *91*, 893–926; (c) R. F. W. Bader, *J. Phys. Chem. A* **1998**, *102*, 7314–7323; (d) F. Biegler-König, R. F. W. Bader, T. H. Tang, *J. Comput. Chem.* **1982**, *3*, 317–328; (e) R. F. W. Bader, *Acc. Chem. Res.* **1985**, *18*, 9–15; (f) T. H. Tang, R. F. W. Bader, P. MacDougall, *Inorg. Chem.* **1985**, *24*, 2047–2053; (g) F. Biegler-König, J. Schönbohm, D. Bayles, *J. Comput. Chem.* **2001**, *22*, 545–559; (h) F. Biegler-König, J. Schönbohm, *J. Comput. Chem.* **2002**, *23*, 1489–1494.
- S3 W. Nakanishi, T. Nakamoto, S. Hayashi, T. Sasamori, N. Tokitoh, *Chem. Eur. J.* **2007**, *13*, 255–268.
- S4 (a) W. Nakanishi, S. Hayashi, K. Narahara, *J. Phys. Chem. A* **2009**, *113*, 10050–10057; (b) W. Nakanishi, S. Hayashi, K. Narahara, *J. Phys. Chem. A* **2008**, *112*, 13593–13599.
- S5 W. Nakanishi, S. Hayashi, *Curr. Org. Chem.* **2010**, *14*, 181–197.
- S6 (a) W. Nakanishi, S. Hayashi, *J. Phys. Chem. A* **2010**, *114*, 7423–7430; (b) W. Nakanishi, S. Hayashi, K. Matsuiwa, M. Kitamoto, *Bull. Chem. Soc. Jpn* **2012**, *85*, 1293–1305.
- S7 W. Nakanishi, S. Hayashi, *J. Phys. Chem. A* **2013**, *117*, 1795–1803.
- S8 W. Nakanishi, S. Hayashi, *Int. J. Quantum Chem.* **2018**, *118*, e25590.
- S9 E. Espinosa, I. Alkorta, J. Elguero, E. Molins, *J. Chem. Phys.* **2002**, *117*, 5529. See also R. Bianchi, G. Gervasio and D. Marabello, *C. R. Chim.*, 2005, **8**, 1392.

## Optimized structures given by Cartesian coordinates

Gaussian 09 programs were employed for the calculations, containing the NBO analysis. The basis sets of the (6211/311/21/2+1s1p), (63211/6111/31/2 + 1s1p1d1f), (743211/74111/721/2 + 1s1p1d1f) and (7433111/743111/7411/2 + 1s1p1d1f) types were employed for O, S, Se and Te, respectively, as implemented from the Sapporo Basis Set Factory, with the 6-311G(d) basis set for C and H. The basis set system is called A (BSS-A). The Møller-Plesset second order energy correlation (MP2) level was applied to the calculations (MP2/BSS-A).

All positive frequencies were obtained for all compounds.

### 1a (N---S-F)

Symmetry C<sub>1</sub>

energy MP2 = -901.1066934 au

Standard orientation

|    |   |           |           |           |
|----|---|-----------|-----------|-----------|
| 6  | 0 | 0.588374  | -0.963982 | -0.343452 |
| 6  | 0 | 0.655338  | 0.417433  | -0.050453 |
| 6  | 0 | 1.900824  | 1.002765  | 0.251740  |
| 6  | 0 | 3.055492  | 0.201879  | 0.264915  |
| 6  | 0 | 2.987005  | -1.175173 | -0.011435 |
| 6  | 0 | 1.744107  | -1.756185 | -0.315171 |
| 1  | 0 | 1.959059  | 2.068522  | 0.466488  |
| 1  | 0 | 4.017245  | 0.661230  | 0.503090  |
| 1  | 0 | 3.889383  | -1.788540 | 0.010490  |
| 1  | 0 | 1.671484  | -2.824333 | -0.536702 |
| 6  | 0 | -0.784525 | -1.459665 | -0.703049 |
| 1  | 0 | -0.993301 | -1.262873 | -1.767275 |
| 1  | 0 | -0.921113 | -2.539124 | -0.506989 |
| 7  | 0 | -1.712837 | -0.637392 | 0.080617  |
| 6  | 0 | -1.738939 | -1.032184 | 1.493125  |
| 1  | 0 | -2.184139 | -2.037156 | 1.609823  |
| 1  | 0 | -0.713569 | -1.039723 | 1.884249  |
| 1  | 0 | -2.331408 | -0.297911 | 2.054006  |
| 6  | 0 | -3.062197 | -0.571645 | -0.479379 |
| 1  | 0 | -3.558033 | -1.557512 | -0.441405 |
| 1  | 0 | -3.651982 | 0.150400  | 0.102265  |
| 1  | 0 | -3.002802 | -0.224512 | -1.518717 |
| 16 | 0 | -0.860733 | 1.342944  | -0.080503 |
| 9  | 0 | -0.054678 | 2.854081  | -0.197405 |

### 1a (N---S-Cl)

Symmetry C<sub>1</sub>

energy MP2 = -1261.0673823 au

Standard orientation

|   |   |           |           |           |
|---|---|-----------|-----------|-----------|
| 6 | 0 | 0.484442  | -1.235180 | -0.414209 |
| 6 | 0 | 0.671090  | 0.111491  | -0.016369 |
| 6 | 0 | 1.954964  | 0.544736  | 0.366555  |
| 6 | 0 | 3.032205  | -0.357483 | 0.337114  |
| 6 | 0 | 2.848280  | -1.693182 | -0.058625 |
| 6 | 0 | 1.564885  | -2.128311 | -0.428450 |
| 1 | 0 | 2.110738  | 1.576987  | 0.676376  |
| 1 | 0 | 4.022612  | -0.008617 | 0.636873  |
| 1 | 0 | 3.690157  | -2.387438 | -0.072882 |
| 1 | 0 | 1.398302  | -3.165391 | -0.731728 |
| 6 | 0 | -0.920522 | -1.606627 | -0.798101 |
| 1 | 0 | -1.136063 | -1.278210 | -1.827925 |
| 1 | 0 | -1.108218 | -2.694570 | -0.725191 |

|    |   |           |           |           |
|----|---|-----------|-----------|-----------|
| 7  | 0 | -1.791123 | -0.835518 | 0.091904  |
| 6  | 0 | -1.790159 | -1.347320 | 1.463690  |
| 1  | 0 | -2.280443 | -2.337752 | 1.514268  |
| 1  | 0 | -0.755089 | -1.437307 | 1.817438  |
| 1  | 0 | -2.328971 | -0.639017 | 2.106843  |
| 6  | 0 | -3.147338 | -0.649719 | -0.416652 |
| 1  | 0 | -3.691596 | -1.610122 | -0.466847 |
| 1  | 0 | -3.687997 | 0.033787  | 0.252833  |
| 1  | 0 | -3.098031 | -0.200361 | -1.417065 |
| 16 | 0 | -0.788734 | 1.145163  | -0.001372 |
| 17 | 0 | 0.225596  | 3.049623  | -0.152593 |

**1a (N---S-Br)**

Symmetry C<sub>1</sub>  
energy MP2 = -3374.0390045 au  
Standard orientation

|    |   |           |           |           |
|----|---|-----------|-----------|-----------|
| 6  | 0 | 1.637525  | 0.637986  | -0.436163 |
| 6  | 0 | 0.291251  | 0.670838  | 0.005451  |
| 6  | 0 | -0.268695 | 1.896730  | 0.412926  |
| 6  | 0 | 0.504503  | 3.069125  | 0.361699  |
| 6  | 0 | 1.837705  | 3.038450  | -0.080747 |
| 6  | 0 | 2.401581  | 1.812958  | -0.472401 |
| 1  | 0 | -1.300612 | 1.935093  | 0.759695  |
| 1  | 0 | 0.056399  | 4.012509  | 0.681079  |
| 1  | 0 | 2.432133  | 3.953258  | -0.112726 |
| 1  | 0 | 3.440709  | 1.764770  | -0.809173 |
| 6  | 0 | 2.159473  | -0.714653 | -0.832999 |
| 1  | 0 | 1.814938  | -0.976463 | -1.846739 |
| 1  | 0 | 3.264756  | -0.765726 | -0.809009 |
| 7  | 0 | 1.542861  | -1.667870 | 0.091013  |
| 6  | 0 | 2.099322  | -1.589230 | 1.441992  |
| 1  | 0 | 3.145535  | -1.949512 | 1.458783  |
| 1  | 0 | 2.070195  | -0.548016 | 1.787938  |
| 1  | 0 | 1.489542  | -2.207943 | 2.113705  |
| 6  | 0 | 1.505980  | -3.040120 | -0.404719 |
| 1  | 0 | 2.523660  | -3.462353 | -0.493453 |
| 1  | 0 | 0.922911  | -3.655906 | 0.294284  |
| 1  | 0 | 1.013748  | -3.055337 | -1.385977 |
| 16 | 0 | -0.563949 | -0.900796 | 0.047531  |
| 35 | 0 | -2.733218 | -0.104259 | -0.085892 |

**1a (N---S-I)**

Symmetry C<sub>1</sub>  
energy MP2 = -7719.4831762 au  
Standard orientation

|   |   |           |           |           |
|---|---|-----------|-----------|-----------|
| 6 | 0 | 2.009789  | 0.637855  | -0.477053 |
| 6 | 0 | 0.685718  | 0.685321  | 0.028926  |
| 6 | 0 | 0.164695  | 1.913855  | 0.478149  |
| 6 | 0 | 0.944434  | 3.079893  | 0.396829  |
| 6 | 0 | 2.251560  | 3.037663  | -0.115840 |
| 6 | 0 | 2.780276  | 1.808211  | -0.542275 |
| 1 | 0 | -0.846232 | 1.962922  | 0.882728  |
| 1 | 0 | 0.523480  | 4.024488  | 0.747881  |
| 1 | 0 | 2.854008  | 3.945983  | -0.173350 |
| 1 | 0 | 3.801622  | 1.751085  | -0.928449 |
| 6 | 0 | 2.521446  | -0.714019 | -0.892336 |

|    |   |           |           |           |
|----|---|-----------|-----------|-----------|
| 1  | 0 | 2.086927  | -1.003789 | -1.863195 |
| 1  | 0 | 3.625820  | -0.728348 | -0.982769 |
| 7  | 0 | 2.031399  | -1.666571 | 0.100383  |
| 6  | 0 | 2.694220  | -1.530736 | 1.393470  |
| 1  | 0 | 3.757348  | -1.838400 | 1.334389  |
| 1  | 0 | 2.643745  | -0.484894 | 1.723778  |
| 1  | 0 | 2.177644  | -2.162569 | 2.128783  |
| 6  | 0 | 2.011507  | -3.046052 | -0.365427 |
| 1  | 0 | 3.033174  | -3.430027 | -0.551198 |
| 1  | 0 | 1.530540  | -3.675354 | 0.396661  |
| 1  | 0 | 1.426781  | -3.106023 | -1.293452 |
| 16 | 0 | -0.185046 | -0.878191 | 0.108728  |
| 53 | 0 | -2.533128 | -0.089999 | -0.062090 |

**1a (N---S-SMe)**

Symmetry C<sub>1</sub>

energy MP2 = -1238.8576566 au

Standard orientation

|    |   |           |           |           |
|----|---|-----------|-----------|-----------|
| 6  | 0 | -0.879263 | 0.869148  | 0.502731  |
| 6  | 0 | 0.303599  | 0.557314  | -0.212788 |
| 6  | 0 | 1.120464  | 1.590877  | -0.709439 |
| 6  | 0 | 0.775163  | 2.932668  | -0.481186 |
| 6  | 0 | -0.392452 | 3.253923  | 0.231976  |
| 6  | 0 | -1.212492 | 2.219548  | 0.710920  |
| 1  | 0 | 2.029014  | 1.340281  | -1.259683 |
| 1  | 0 | 1.416616  | 3.725618  | -0.872064 |
| 1  | 0 | -0.664057 | 4.296535  | 0.407806  |
| 1  | 0 | -2.128815 | 2.456204  | 1.258521  |
| 6  | 0 | -1.761436 | -0.248641 | 0.994194  |
| 1  | 0 | -1.203508 | -0.870771 | 1.713873  |
| 1  | 0 | -2.649839 | 0.166158  | 1.519424  |
| 7  | 0 | -2.137133 | -1.108005 | -0.122489 |
| 6  | 0 | -3.022041 | -0.420081 | -1.050806 |
| 1  | 0 | -3.986015 | -0.134940 | -0.574347 |
| 1  | 0 | -2.535699 | 0.491871  | -1.423809 |
| 1  | 0 | -3.235759 | -1.077949 | -1.904868 |
| 6  | 0 | -2.724543 | -2.353588 | 0.342274  |
| 1  | 0 | -3.662360 | -2.190568 | 0.916639  |
| 1  | 0 | -2.954748 | -2.993966 | -0.520941 |
| 1  | 0 | -2.005545 | -2.880002 | 0.986358  |
| 16 | 0 | 0.702399  | -1.172872 | -0.456955 |
| 16 | 0 | 2.756032  | -1.151800 | -0.438211 |
| 6  | 0 | 3.080116  | -0.883100 | 1.326174  |
| 1  | 0 | 2.624874  | -1.685889 | 1.920642  |
| 1  | 0 | 4.172755  | -0.895236 | 1.453468  |
| 1  | 0 | 2.685428  | 0.095027  | 1.634765  |

**1a (N---S-CMe)**

Symmetry C<sub>1</sub>

energy MP2 = -841.168204 au

Standard orientation

|   |   |          |           |           |
|---|---|----------|-----------|-----------|
| 6 | 0 | 0.097589 | -0.834414 | -0.472046 |
| 6 | 0 | 0.882448 | 0.250186  | 0.001036  |
| 6 | 0 | 2.212765 | 0.015914  | 0.408667  |
| 6 | 0 | 2.766681 | -1.272867 | 0.335410  |
| 6 | 0 | 1.995960 | -2.348608 | -0.132895 |

|    |   |           |           |           |
|----|---|-----------|-----------|-----------|
| 6  | 0 | 0.667890  | -2.118205 | -0.527330 |
| 1  | 0 | 2.823943  | 0.834342  | 0.789599  |
| 1  | 0 | 3.798940  | -1.431654 | 0.655043  |
| 1  | 0 | 2.421147  | -3.352399 | -0.188975 |
| 1  | 0 | 0.055195  | -2.946949 | -0.892350 |
| 6  | 0 | -1.326066 | -0.598759 | -0.905708 |
| 1  | 0 | -1.342578 | 0.158815  | -1.706626 |
| 1  | 0 | -1.754981 | -1.539975 | -1.316892 |
| 7  | 0 | -2.124205 | -0.080533 | 0.199177  |
| 6  | 0 | -2.286733 | -1.075505 | 1.247379  |
| 1  | 0 | -2.828243 | -1.978712 | 0.886451  |
| 1  | 0 | -1.302354 | -1.388272 | 1.622310  |
| 1  | 0 | -2.855702 | -0.638251 | 2.080039  |
| 6  | 0 | -3.412475 | 0.399327  | -0.271039 |
| 1  | 0 | -4.023039 | -0.408543 | -0.731761 |
| 1  | 0 | -3.977819 | 0.820000  | 0.572763  |
| 1  | 0 | -3.259129 | 1.190959  | -1.018498 |
| 16 | 0 | 0.143212  | 1.859828  | 0.066326  |
| 6  | 0 | 1.601008  | 2.918125  | -0.130006 |
| 1  | 0 | 1.205629  | 3.928680  | -0.302636 |
| 1  | 0 | 2.223931  | 2.938511  | 0.773768  |
| 1  | 0 | 2.198712  | 2.608771  | -0.998500 |

**1b (N---Se-F)**

Symmetry C<sub>1</sub>

energy MP2 = -2903.4919973 au

Standard orientation

|    |   |           |           |           |
|----|---|-----------|-----------|-----------|
| 6  | 0 | 0.886453  | -1.075117 | -0.340482 |
| 6  | 0 | 0.804473  | 0.301248  | -0.038662 |
| 6  | 0 | 1.970261  | 1.029554  | 0.259973  |
| 6  | 0 | 3.210655  | 0.368455  | 0.260880  |
| 6  | 0 | 3.296708  | -1.006671 | -0.022459 |
| 6  | 0 | 2.128350  | -1.727253 | -0.323466 |
| 1  | 0 | 1.900329  | 2.094670  | 0.478717  |
| 1  | 0 | 4.115843  | 0.932997  | 0.494805  |
| 1  | 0 | 4.263780  | -1.512433 | -0.009649 |
| 1  | 0 | 2.181301  | -2.795257 | -0.551821 |
| 6  | 0 | -0.411614 | -1.737723 | -0.714012 |
| 1  | 0 | -0.646069 | -1.535991 | -1.772379 |
| 1  | 0 | -0.392458 | -2.832266 | -0.556725 |
| 7  | 0 | -1.464298 | -1.097249 | 0.088517  |
| 6  | 0 | -1.409473 | -1.530733 | 1.491248  |
| 1  | 0 | -1.648432 | -2.606960 | 1.574544  |
| 1  | 0 | -0.401847 | -1.349105 | 1.886039  |
| 1  | 0 | -2.133777 | -0.945979 | 2.072702  |
| 6  | 0 | -2.804559 | -1.294644 | -0.469266 |
| 1  | 0 | -3.087213 | -2.362338 | -0.452186 |
| 1  | 0 | -3.528185 | -0.723402 | 0.128586  |
| 1  | 0 | -2.823289 | -0.923219 | -1.501876 |
| 34 | 0 | -0.931421 | 1.095122  | -0.049783 |
| 9  | 0 | -0.212120 | 2.782577  | -0.148922 |

**1b (N---Se-Cl)**

Symmetry C<sub>1</sub>

energy MP2 = -3263.4546782 au

Standard orientation

|    |   |           |           |           |
|----|---|-----------|-----------|-----------|
| 6  | 0 | 1.151424  | -1.052524 | -0.393290 |
| 6  | 0 | 0.785899  | 0.261189  | -0.019550 |
| 6  | 0 | 1.779005  | 1.189678  | 0.338831  |
| 6  | 0 | 3.129868  | 0.801336  | 0.313624  |
| 6  | 0 | 3.499140  | -0.504497 | -0.052895 |
| 6  | 0 | 2.502538  | -1.430810 | -0.402548 |
| 1  | 0 | 1.499542  | 2.203367  | 0.624817  |
| 1  | 0 | 3.896572  | 1.526951  | 0.593362  |
| 1  | 0 | 4.549932  | -0.799183 | -0.063026 |
| 1  | 0 | 2.772552  | -2.451282 | -0.687615 |
| 6  | 0 | 0.027952  | -1.972265 | -0.785419 |
| 1  | 0 | -0.291449 | -1.762245 | -1.819624 |
| 1  | 0 | 0.311894  | -3.039094 | -0.711224 |
| 7  | 0 | -1.109482 | -1.654187 | 0.087055  |
| 6  | 0 | -0.893328 | -2.118542 | 1.462068  |
| 1  | 0 | -0.866341 | -3.223657 | 1.500181  |
| 1  | 0 | 0.058194  | -1.718985 | 1.835127  |
| 1  | 0 | -1.711166 | -1.749776 | 2.094784  |
| 6  | 0 | -2.387562 | -2.134348 | -0.440235 |
| 1  | 0 | -2.409979 | -3.238409 | -0.480820 |
| 1  | 0 | -3.198795 | -1.784251 | 0.213014  |
| 1  | 0 | -2.538901 | -1.725390 | -1.447705 |
| 34 | 0 | -1.098745 | 0.639391  | -0.002379 |
| 17 | 0 | -0.853998 | 2.903921  | -0.135489 |

**1b (N---Se-Br)**

Symmetry C<sub>1</sub>

energy MP2 = -5376.4263458 au

Standard orientation

|    |   |           |           |           |
|----|---|-----------|-----------|-----------|
| 6  | 0 | 1.771558  | 0.735070  | -0.412796 |
| 6  | 0 | 0.418986  | 0.810283  | -0.005831 |
| 6  | 0 | -0.128748 | 2.047990  | 0.374474  |
| 6  | 0 | 0.672568  | 3.202246  | 0.335195  |
| 6  | 0 | 2.017303  | 3.133657  | -0.067625 |
| 6  | 0 | 2.563515  | 1.893213  | -0.436798 |
| 1  | 0 | -1.170359 | 2.110189  | 0.689023  |
| 1  | 0 | 0.239523  | 4.159808  | 0.632121  |
| 1  | 0 | 2.634411  | 4.033545  | -0.089684 |
| 1  | 0 | 3.609206  | 1.821157  | -0.748076 |
| 6  | 0 | 2.277688  | -0.622224 | -0.817176 |
| 1  | 0 | 1.944283  | -0.863123 | -1.840184 |
| 1  | 0 | 3.381942  | -0.685740 | -0.779802 |
| 7  | 0 | 1.649283  | -1.599588 | 0.079081  |
| 6  | 0 | 2.193065  | -1.531754 | 1.439230  |
| 1  | 0 | 3.252377  | -1.850745 | 1.452409  |
| 1  | 0 | 2.120136  | -0.501291 | 1.809533  |
| 1  | 0 | 1.604510  | -2.190723 | 2.090955  |
| 6  | 0 | 1.687984  | -2.965526 | -0.442907 |
| 1  | 0 | 2.727508  | -3.334479 | -0.513196 |
| 1  | 0 | 1.120620  | -3.622732 | 0.230629  |
| 1  | 0 | 1.222452  | -2.985695 | -1.436991 |
| 34 | 0 | -0.540659 | -0.857446 | 0.031379  |
| 35 | 0 | -2.762649 | 0.115496  | -0.083194 |

**1b (N---Se-I)**

Symmetry C<sub>1</sub>

energy MP2 = -9721.8695846 au

Standard orientation

|    |   |           |           |           |
|----|---|-----------|-----------|-----------|
| 6  | 0 | 2.105230  | 0.773062  | -0.443478 |
| 6  | 0 | 0.764263  | 0.815871  | 0.007510  |
| 6  | 0 | 0.207158  | 2.038898  | 0.420796  |
| 6  | 0 | 0.979179  | 3.212082  | 0.363335  |
| 6  | 0 | 2.308847  | 3.176794  | -0.089327 |
| 6  | 0 | 2.867895  | 1.950620  | -0.485438 |
| 1  | 0 | -0.822532 | 2.079589  | 0.776637  |
| 1  | 0 | 0.535263  | 4.156396  | 0.685502  |
| 1  | 0 | 2.904990  | 4.090196  | -0.127133 |
| 1  | 0 | 3.904157  | 1.903258  | -0.831116 |
| 6  | 0 | 2.644304  | -0.567731 | -0.861523 |
| 1  | 0 | 2.266177  | -0.833904 | -1.862579 |
| 1  | 0 | 3.751442  | -0.577671 | -0.888509 |
| 7  | 0 | 2.113550  | -1.561268 | 0.074906  |
| 6  | 0 | 2.709519  | -1.446297 | 1.406923  |
| 1  | 0 | 3.784267  | -1.711568 | 1.382737  |
| 1  | 0 | 2.601258  | -0.415670 | 1.768551  |
| 1  | 0 | 2.183860  | -2.124112 | 2.092676  |
| 6  | 0 | 2.191465  | -2.928526 | -0.432515 |
| 1  | 0 | 3.242226  | -3.252251 | -0.554019 |
| 1  | 0 | 1.691338  | -3.603655 | 0.275875  |
| 1  | 0 | 1.677592  | -2.984984 | -1.401419 |
| 34 | 0 | -0.155688 | -0.877669 | 0.067084  |
| 53 | 0 | -2.601673 | 0.035762  | -0.064907 |

**1b** (N---Se--SeMe)

Symmetry C<sub>1</sub>

energy MP2 = -5243.610077 au

Standard orientation

|    |   |           |           |           |
|----|---|-----------|-----------|-----------|
| 6  | 0 | -1.697522 | 0.885150  | 0.485690  |
| 6  | 0 | -0.426769 | 0.808343  | -0.132937 |
| 6  | 0 | 0.175678  | 1.970531  | -0.647360 |
| 6  | 0 | -0.474710 | 3.210513  | -0.529850 |
| 6  | 0 | -1.733602 | 3.298283  | 0.088575  |
| 6  | 0 | -2.338362 | 2.132357  | 0.586060  |
| 1  | 0 | 1.155314  | 1.905101  | -1.124820 |
| 1  | 0 | 0.002345  | 4.106232  | -0.934221 |
| 1  | 0 | -2.241466 | 4.260729  | 0.176016  |
| 1  | 0 | -3.323048 | 2.184215  | 1.059008  |
| 6  | 0 | -2.328076 | -0.379608 | 1.007750  |
| 1  | 0 | -1.772426 | -0.732976 | 1.893303  |
| 1  | 0 | -3.380110 | -0.196430 | 1.314794  |
| 7  | 0 | -2.221876 | -1.418157 | -0.009728 |
| 6  | 0 | -3.054424 | -1.134224 | -1.170448 |
| 1  | 0 | -4.135689 | -1.141184 | -0.915159 |
| 1  | 0 | -2.797538 | -0.147321 | -1.578794 |
| 1  | 0 | -2.869785 | -1.893937 | -1.942791 |
| 6  | 0 | -2.484213 | -2.743050 | 0.528418  |
| 1  | 0 | -3.522870 | -2.843969 | 0.907349  |
| 1  | 0 | -2.326848 | -3.493569 | -0.259182 |
| 1  | 0 | -1.785534 | -2.947364 | 1.352305  |
| 34 | 0 | 0.409843  | -0.930189 | -0.249878 |
| 34 | 0 | 2.646335  | -0.258826 | -0.243753 |
| 6  | 0 | 2.747129  | 0.298795  | 1.622957  |
| 1  | 0 | 2.482238  | -0.544970 | 2.271798  |
| 1  | 0 | 3.783270  | 0.613456  | 1.812234  |

1 0 2.064431 1.143071 1.786577

**1b** (N---Se-C<sub>Me</sub>)

Symmetry C<sub>1</sub>

energy MP2 = -2843.5385263 au

Standard orientation

|    |   |           |           |           |
|----|---|-----------|-----------|-----------|
| 6  | 0 | 0.277328  | -1.192703 | -0.465094 |
| 6  | 0 | 0.859970  | 0.014428  | -0.005380 |
| 6  | 0 | 2.207953  | 0.022520  | 0.406478  |
| 6  | 0 | 2.978297  | -1.151226 | 0.346589  |
| 6  | 0 | 2.406910  | -2.349757 | -0.110356 |
| 6  | 0 | 1.059377  | -2.360239 | -0.506500 |
| 1  | 0 | 2.665173  | 0.939229  | 0.780449  |
| 1  | 0 | 4.021463  | -1.126079 | 0.669635  |
| 1  | 0 | 3.000075  | -3.265240 | -0.152782 |
| 1  | 0 | 0.600162  | -3.288337 | -0.857970 |
| 6  | 0 | -1.165089 | -1.200786 | -0.901093 |
| 1  | 0 | -1.283352 | -0.547446 | -1.782251 |
| 1  | 0 | -1.471055 | -2.229255 | -1.194700 |
| 7  | 0 | -2.010866 | -0.659906 | 0.154848  |
| 6  | 0 | -2.043961 | -1.534681 | 1.316547  |
| 1  | 0 | -2.493059 | -2.524808 | 1.080819  |
| 1  | 0 | -1.023418 | -1.696227 | 1.690441  |
| 1  | 0 | -2.637966 | -1.061944 | 2.111454  |
| 6  | 0 | -3.349336 | -0.371663 | -0.330909 |
| 1  | 0 | -3.877268 | -1.284318 | -0.683550 |
| 1  | 0 | -3.942427 | 0.080144  | 0.477007  |
| 1  | 0 | -3.290411 | 0.343606  | -1.163904 |
| 34 | 0 | -0.215162 | 1.595475  | 0.047448  |
| 6  | 0 | 1.222266  | 2.888576  | -0.222242 |
| 1  | 0 | 0.721154  | 3.843247  | -0.433836 |
| 1  | 0 | 1.840536  | 3.004262  | 0.676503  |
| 1  | 0 | 1.839659  | 2.599547  | -1.082738 |

**2a** (O---S-F)

Symmetry C<sub>1</sub>

energy MP2 = -881.7703824 au

Standard orientation

|   |   |           |           |           |
|---|---|-----------|-----------|-----------|
| 6 | 0 | 0.422629  | -0.895070 | -0.423271 |
| 6 | 0 | 0.314354  | 0.469734  | -0.065908 |
| 6 | 0 | 1.455075  | 1.180399  | 0.358331  |
| 6 | 0 | 2.697144  | 0.527345  | 0.415769  |
| 6 | 0 | 2.810685  | -0.831695 | 0.077744  |
| 6 | 0 | 1.667203  | -1.537247 | -0.331462 |
| 1 | 0 | 1.371979  | 2.231955  | 0.630465  |
| 1 | 0 | 3.577269  | 1.085927  | 0.740617  |
| 1 | 0 | 3.775896  | -1.337169 | 0.137991  |
| 1 | 0 | 1.739211  | -2.595965 | -0.594447 |
| 6 | 0 | -0.827117 | -1.588619 | -0.898351 |
| 1 | 0 | -1.065079 | -1.296815 | -1.932730 |
| 1 | 0 | -0.727818 | -2.686582 | -0.845322 |
| 8 | 0 | -1.942162 | -1.143690 | -0.126178 |
| 6 | 0 | -1.924106 | -1.660002 | 1.204489  |
| 1 | 0 | -2.017653 | -2.758842 | 1.184596  |
| 1 | 0 | -0.994438 | -1.380529 | 1.726812  |
| 1 | 0 | -2.785151 | -1.222060 | 1.721836  |



|    |   |           |          |           |
|----|---|-----------|----------|-----------|
| 16 | 0 | -1.276345 | 1.244738 | -0.147683 |
| 9  | 0 | -0.734509 | 2.800524 | -0.157946 |

**2a (O---S-Cl)**

Symmetry C<sub>1</sub>  
 energy MP2 = -1241.7356157 au  
 Standard orientation

|    |   |           |           |           |
|----|---|-----------|-----------|-----------|
| 6  | 0 | 1.159629  | 0.169811  | -0.496553 |
| 6  | 0 | -0.150352 | 0.418859  | -0.014610 |
| 6  | 0 | -0.495948 | 1.695398  | 0.468603  |
| 6  | 0 | 0.454916  | 2.728455  | 0.454266  |
| 6  | 0 | 1.757304  | 2.493630  | -0.016619 |
| 6  | 0 | 2.101527  | 1.212442  | -0.476502 |
| 1  | 0 | -1.502367 | 1.883121  | 0.842694  |
| 1  | 0 | 0.174223  | 3.716636  | 0.824098  |
| 1  | 0 | 2.497241  | 3.295760  | -0.018971 |
| 1  | 0 | 3.113708  | 1.013980  | -0.838867 |
| 6  | 0 | 1.511113  | -1.209788 | -0.994634 |
| 1  | 0 | 0.941410  | -1.449124 | -1.905020 |
| 1  | 0 | 2.591420  | -1.275751 | -1.216374 |
| 8  | 0 | 1.132622  | -2.207661 | -0.050742 |
| 6  | 0 | 1.899314  | -2.139214 | 1.146109  |
| 1  | 0 | 2.972730  | -2.278884 | 0.926629  |
| 1  | 0 | 1.760347  | -1.172631 | 1.658876  |
| 1  | 0 | 1.547158  | -2.951954 | 1.791890  |
| 16 | 0 | -1.272609 | -0.961508 | 0.003107  |
| 17 | 0 | -3.071772 | 0.002748  | -0.125241 |

**2a (O---S-Br)**

Symmetry C<sub>1</sub>  
 energy MP2 = -3354.7079255 au  
 Standard orientation

|    |   |           |           |           |
|----|---|-----------|-----------|-----------|
| 6  | 0 | 1.645000  | 0.185479  | -0.511830 |
| 6  | 0 | 0.349102  | 0.416644  | 0.016409  |
| 6  | 0 | 0.005018  | 1.687740  | 0.515057  |
| 6  | 0 | 0.939121  | 2.734577  | 0.467944  |
| 6  | 0 | 2.226385  | 2.518601  | -0.051465 |
| 6  | 0 | 2.571236  | 1.242795  | -0.525193 |
| 1  | 0 | -0.990047 | 1.860570  | 0.926028  |
| 1  | 0 | 0.658291  | 3.718115  | 0.850323  |
| 1  | 0 | 2.954317  | 3.331302  | -0.080903 |
| 1  | 0 | 3.572537  | 1.058903  | -0.924076 |
| 6  | 0 | 2.007258  | -1.189214 | -1.017070 |
| 1  | 0 | 1.384875  | -1.459484 | -1.882984 |
| 1  | 0 | 3.071440  | -1.218983 | -1.313250 |
| 8  | 0 | 1.734356  | -2.189344 | -0.040062 |
| 6  | 0 | 2.571567  | -2.070751 | 1.103531  |
| 1  | 0 | 3.635121  | -2.155551 | 0.816949  |
| 1  | 0 | 2.415373  | -1.108709 | 1.620102  |
| 1  | 0 | 2.305504  | -2.895423 | 1.775008  |
| 16 | 0 | -0.742898 | -0.986776 | 0.081395  |
| 35 | 0 | -2.710972 | -0.028080 | -0.078666 |

**2a (O---S-I)**

Symmetry C<sub>1</sub>  
 energy MP2 = -7700.1552981 au  
 Standard orientation

|    |   |           |           |           |
|----|---|-----------|-----------|-----------|
| 6  | 0 | 2.036750  | 0.187974  | -0.528370 |
| 6  | 0 | 0.767499  | 0.418342  | 0.061989  |
| 6  | 0 | 0.447051  | 1.689500  | 0.576567  |
| 6  | 0 | 1.372356  | 2.740236  | 0.480757  |
| 6  | 0 | 2.631242  | 2.527096  | -0.105731 |
| 6  | 0 | 2.955168  | 1.251452  | -0.593571 |
| 1  | 0 | -0.526267 | 1.859896  | 1.039102  |
| 1  | 0 | 1.108352  | 3.723257  | 0.876257  |
| 1  | 0 | 3.353322  | 3.342518  | -0.176609 |
| 1  | 0 | 3.935152  | 1.070883  | -1.043658 |
| 6  | 0 | 2.394586  | -1.186757 | -1.039236 |
| 1  | 0 | 1.693789  | -1.501598 | -1.825974 |
| 1  | 0 | 3.420498  | -1.179531 | -1.450730 |
| 8  | 0 | 2.277837  | -2.175089 | -0.020905 |
| 6  | 0 | 3.219870  | -1.985578 | 1.025854  |
| 1  | 0 | 4.252045  | -2.004471 | 0.631345  |
| 1  | 0 | 3.055753  | -1.028762 | 1.550080  |
| 1  | 0 | 3.081644  | -2.816031 | 1.728193  |
| 16 | 0 | -0.311358 | -0.992841 | 0.197814  |
| 53 | 0 | -2.482309 | -0.038370 | -0.067837 |

**2a (O---S-SMe)**

Symmetry C<sub>1</sub>  
 energy MP2 = -1219.5337671 au  
 Standard orientation

|    |   |           |           |           |
|----|---|-----------|-----------|-----------|
| 6  | 0 | -1.269727 | 0.251383  | 0.520412  |
| 6  | 0 | -0.040527 | 0.371690  | -0.175460 |
| 6  | 0 | 0.342015  | 1.609568  | -0.726073 |
| 6  | 0 | -0.483868 | 2.734398  | -0.572342 |
| 6  | 0 | -1.704521 | 2.629742  | 0.115924  |
| 6  | 0 | -2.089400 | 1.388531  | 0.646812  |
| 1  | 0 | 1.290193  | 1.688992  | -1.260848 |
| 1  | 0 | -0.174751 | 3.689642  | -1.002339 |
| 1  | 0 | -2.350463 | 3.501882  | 0.232840  |
| 1  | 0 | -3.040069 | 1.293483  | 1.178832  |
| 6  | 0 | -1.699250 | -1.078541 | 1.094580  |
| 1  | 0 | -0.951376 | -1.450171 | 1.810194  |
| 1  | 0 | -2.667541 | -0.961572 | 1.616025  |
| 8  | 0 | -1.795618 | -2.091670 | 0.101040  |
| 6  | 0 | -2.803881 | -1.811908 | -0.858271 |
| 1  | 0 | -3.787644 | -1.686846 | -0.369517 |
| 1  | 0 | -2.574204 | -0.899115 | -1.433905 |
| 1  | 0 | -2.840662 | -2.672130 | -1.537191 |
| 16 | 0 | 0.962219  | -1.101252 | -0.343615 |
| 16 | 0 | 2.864731  | -0.363228 | -0.455936 |
| 6  | 0 | 3.166458  | 0.089280  | 1.274902  |
| 1  | 0 | 3.058357  | -0.792149 | 1.919816  |
| 1  | 0 | 4.198399  | 0.467248  | 1.324669  |
| 1  | 0 | 2.469726  | 0.880903  | 1.583013  |

**2a (O---S-C<sub>Me</sub>)**

Symmetry C<sub>1</sub>  
 energy MP2 = -821.8455735 au

## Standard orientation

|    |   |           |           |           |
|----|---|-----------|-----------|-----------|
| 6  | 0 | 0.704325  | 0.456254  | -0.489223 |
| 6  | 0 | -0.611820 | 0.168552  | -0.038989 |
| 6  | 0 | -1.434778 | 1.222235  | 0.411789  |
| 6  | 0 | -0.966757 | 2.546767  | 0.407293  |
| 6  | 0 | 0.333771  | 2.837427  | -0.032812 |
| 6  | 0 | 1.157205  | 1.787233  | -0.470037 |
| 1  | 0 | -2.443318 | 1.019802  | 0.772049  |
| 1  | 0 | -1.622037 | 3.346973  | 0.758229  |
| 1  | 0 | 0.702547  | 3.864699  | -0.033783 |
| 1  | 0 | 2.172914  | 1.998929  | -0.815462 |
| 6  | 0 | 1.606637  | -0.649883 | -0.985306 |
| 1  | 0 | 1.125221  | -1.195188 | -1.810236 |
| 1  | 0 | 2.555927  | -0.213145 | -1.348454 |
| 8  | 0 | 1.871021  | -1.635965 | 0.004365  |
| 6  | 0 | 2.561318  | -1.104671 | 1.123383  |
| 1  | 0 | 3.509334  | -0.627532 | 0.812265  |
| 1  | 0 | 1.950083  | -0.360612 | 1.662119  |
| 1  | 0 | 2.779953  | -1.947953 | 1.789481  |
| 16 | 0 | -1.140270 | -1.520215 | -0.049359 |
| 6  | 0 | -2.939261 | -1.340942 | -0.062094 |
| 1  | 0 | -3.329258 | -2.351914 | -0.242791 |
| 1  | 0 | -3.325425 | -0.984557 | 0.901817  |
| 1  | 0 | -3.263621 | -0.676167 | -0.874427 |

**2b (O---Se-F)**Symmetry C<sub>1</sub>

energy MP2 = -2884.1538704 au

## Standard orientation

|    |   |           |           |           |
|----|---|-----------|-----------|-----------|
| 6  | 0 | -1.083655 | 0.762176  | -0.402523 |
| 6  | 0 | -0.435507 | -0.438628 | -0.040596 |
| 6  | 0 | -1.186172 | -1.557362 | 0.365722  |
| 6  | 0 | -2.587843 | -1.467515 | 0.405270  |
| 6  | 0 | -3.241617 | -0.270978 | 0.062542  |
| 6  | 0 | -2.483600 | 0.843087  | -0.334628 |
| 1  | 0 | -0.680451 | -2.483651 | 0.637887  |
| 1  | 0 | -3.169489 | -2.336928 | 0.718667  |
| 1  | 0 | -4.329966 | -0.204917 | 0.108615  |
| 1  | 0 | -2.980211 | 1.779452  | -0.603165 |
| 6  | 0 | -0.210341 | 1.895723  | -0.872194 |
| 1  | 0 | 0.111240  | 1.736976  | -1.913033 |
| 1  | 0 | -0.716880 | 2.871938  | -0.791461 |
| 8  | 0 | 1.005009  | 1.901511  | -0.112125 |
| 6  | 0 | 0.809957  | 2.390856  | 1.219552  |
| 1  | 0 | 0.498496  | 3.447290  | 1.183388  |
| 1  | 0 | 0.049063  | 1.795826  | 1.749315  |
| 1  | 0 | 1.775176  | 2.300861  | 1.729870  |
| 34 | 0 | 1.471598  | -0.488796 | -0.106628 |
| 9  | 0 | 1.542366  | -2.271560 | -0.079624 |

**2b (O---Se-Cl)**Symmetry C<sub>1</sub>

energy MP2 = -3244.1186462 au

## Standard orientation

|   |   |          |           |           |
|---|---|----------|-----------|-----------|
| 6 | 0 | 1.501395 | -0.075041 | -0.455752 |
| 6 | 0 | 0.299442 | 0.534250  | -0.025100 |

|    |   |           |           |           |
|----|---|-----------|-----------|-----------|
| 6  | 0 | 0.304874  | 1.864646  | 0.430917  |
| 6  | 0 | 1.508111  | 2.590359  | 0.442016  |
| 6  | 0 | 2.708402  | 1.993976  | 0.020754  |
| 6  | 0 | 2.698117  | 0.659599  | -0.416874 |
| 1  | 0 | -0.620365 | 2.333540  | 0.765947  |
| 1  | 0 | 1.503516  | 3.624144  | 0.793576  |
| 1  | 0 | 3.642253  | 2.558384  | 0.040038  |
| 1  | 0 | 3.626127  | 0.180384  | -0.740439 |
| 6  | 0 | 1.446117  | -1.500121 | -0.942626 |
| 1  | 0 | 0.969421  | -1.556291 | -1.933280 |
| 1  | 0 | 2.454760  | -1.944585 | -0.999216 |
| 8  | 0 | 0.604766  | -2.278274 | -0.088112 |
| 6  | 0 | 1.191044  | -2.502983 | 1.194782  |
| 1  | 0 | 2.120634  | -3.086998 | 1.087506  |
| 1  | 0 | 1.412893  | -1.550439 | 1.702906  |
| 1  | 0 | 0.458666  | -3.072737 | 1.777869  |
| 34 | 0 | -1.283394 | -0.554531 | -0.051146 |
| 17 | 0 | -2.747979 | 1.070983  | -0.090572 |

**2b (O---Se-Br)**

Symmetry C<sub>1</sub>

energy MP2 = -5357.0908835 au

Standard orientation

|    |   |           |           |           |
|----|---|-----------|-----------|-----------|
| 6  | 0 | 1.884738  | 0.228566  | -0.475082 |
| 6  | 0 | 0.581712  | 0.531755  | -0.012982 |
| 6  | 0 | 0.283076  | 1.821201  | 0.462378  |
| 6  | 0 | 1.278533  | 2.812706  | 0.459622  |
| 6  | 0 | 2.575570  | 2.523114  | 0.004317  |
| 6  | 0 | 2.871922  | 1.228139  | -0.450841 |
| 1  | 0 | -0.718789 | 2.054320  | 0.823493  |
| 1  | 0 | 1.036121  | 3.812295  | 0.826279  |
| 1  | 0 | 3.348671  | 3.293375  | 0.011150  |
| 1  | 0 | 3.879554  | 0.986108  | -0.799657 |
| 6  | 0 | 2.169055  | -1.165275 | -0.973536 |
| 1  | 0 | 1.674840  | -1.342038 | -1.941106 |
| 1  | 0 | 3.254394  | -1.334069 | -1.084326 |
| 8  | 0 | 1.600985  | -2.134363 | -0.090871 |
| 6  | 0 | 2.273846  | -2.185372 | 1.166703  |
| 1  | 0 | 3.325012  | -2.488250 | 1.022524  |
| 1  | 0 | 2.242035  | -1.208284 | 1.675982  |
| 1  | 0 | 1.750892  | -2.935306 | 1.771091  |
| 34 | 0 | -0.689490 | -0.910668 | -0.015164 |
| 35 | 0 | -2.647676 | 0.355156  | -0.061325 |

**2b (O---Se-I)**

Symmetry C<sub>1</sub>

energy MP2 = -9702.5365683 au

Standard orientation

|   |   |           |          |           |
|---|---|-----------|----------|-----------|
| 6 | 0 | 2.214674  | 0.311031 | -0.506306 |
| 6 | 0 | 0.914034  | 0.535321 | 0.007325  |
| 6 | 0 | 0.563205  | 1.800068 | 0.512752  |
| 6 | 0 | 1.496939  | 2.849172 | 0.483985  |
| 6 | 0 | 2.788538  | 2.640529 | -0.027280 |
| 6 | 0 | 3.140160  | 1.369252 | -0.508517 |
| 1 | 0 | -0.434783 | 1.972230 | 0.917604  |
| 1 | 0 | 1.211307  | 3.828519 | 0.873460  |

|    |   |           |           |           |
|----|---|-----------|-----------|-----------|
| 1  | 0 | 3.515148  | 3.454696  | -0.043378 |
| 1  | 0 | 4.145661  | 1.190010  | -0.898938 |
| 6  | 0 | 2.579198  | -1.058919 | -1.021352 |
| 1  | 0 | 2.016546  | -1.292404 | -1.937984 |
| 1  | 0 | 3.661031  | -1.118909 | -1.235743 |
| 8  | 0 | 2.199617  | -2.070869 | -0.090054 |
| 6  | 0 | 2.965379  | -2.018671 | 1.110412  |
| 1  | 0 | 4.036198  | -2.172418 | 0.889832  |
| 1  | 0 | 2.837368  | -1.052529 | 1.626207  |
| 1  | 0 | 2.600150  | -2.829959 | 1.750693  |
| 34 | 0 | -0.263679 | -0.986637 | 0.044337  |
| 53 | 0 | -2.494212 | 0.180504  | -0.057262 |

**2b (O---Se--SeMe)**

Symmetry C<sub>1</sub>

energy MP2 = -5224.2836861 au

Standard orientation

|    |   |           |           |           |
|----|---|-----------|-----------|-----------|
| 6  | 0 | -1.928540 | 0.353135  | 0.521789  |
| 6  | 0 | -0.672783 | 0.515714  | -0.111531 |
| 6  | 0 | -0.334306 | 1.745592  | -0.704069 |
| 6  | 0 | -1.233866 | 2.823151  | -0.651360 |
| 6  | 0 | -2.482195 | 2.676096  | -0.023174 |
| 6  | 0 | -2.822062 | 1.439977  | 0.549343  |
| 1  | 0 | 0.635637  | 1.861537  | -1.191914 |
| 1  | 0 | -0.959304 | 3.774188  | -1.113341 |
| 1  | 0 | -3.184982 | 3.510628  | 0.013671  |
| 1  | 0 | -3.794795 | 1.310262  | 1.032178  |
| 6  | 0 | -2.299465 | -0.973119 | 1.141787  |
| 1  | 0 | -1.623533 | -1.212384 | 1.976743  |
| 1  | 0 | -3.337481 | -0.936060 | 1.520596  |
| 8  | 0 | -2.146286 | -2.050320 | 0.224323  |
| 6  | 0 | -3.043118 | -1.956095 | -0.874312 |
| 1  | 0 | -4.090720 | -1.944479 | -0.522816 |
| 1  | 0 | -2.856106 | -1.047781 | -1.471653 |
| 1  | 0 | -2.874716 | -2.844071 | -1.495010 |
| 34 | 0 | 0.510402  | -1.009075 | -0.155767 |
| 34 | 0 | 2.554872  | 0.056322  | -0.276609 |
| 6  | 0 | 2.649776  | 0.690493  | 1.565371  |
| 1  | 0 | 2.593458  | -0.163987 | 2.250209  |
| 1  | 0 | 3.615294  | 1.204742  | 1.675117  |
| 1  | 0 | 1.827554  | 1.393887  | 1.749360  |

**2b (O---Se--C<sub>Me</sub>)**

Symmetry C<sub>1</sub>

energy MP2 = -2824.214722 au

Standard orientation

|   |   |           |           |           |
|---|---|-----------|-----------|-----------|
| 6 | 0 | -1.205489 | 0.141736  | -0.484500 |
| 6 | 0 | -0.085280 | -0.594652 | -0.024058 |
| 6 | 0 | -0.263156 | -1.915325 | 0.435513  |
| 6 | 0 | -1.536926 | -2.508288 | 0.424819  |
| 6 | 0 | -2.651025 | -1.784333 | -0.028836 |
| 6 | 0 | -2.475234 | -0.463009 | -0.470623 |
| 1 | 0 | 0.584976  | -2.490139 | 0.808169  |
| 1 | 0 | -1.654347 | -3.533608 | 0.782162  |
| 1 | 0 | -3.643217 | -2.239056 | -0.032367 |
| 1 | 0 | -3.335701 | 0.113473  | -0.821395 |

|    |   |           |           |           |
|----|---|-----------|-----------|-----------|
| 6  | 0 | -1.034320 | 1.556967  | -0.984440 |
| 1  | 0 | -0.364539 | 1.575716  | -1.857373 |
| 1  | 0 | -2.017465 | 1.970803  | -1.276500 |
| 8  | 0 | -0.411320 | 2.401612  | -0.024874 |
| 6  | 0 | -1.194130 | 2.553606  | 1.149440  |
| 1  | 0 | -2.192476 | 2.961254  | 0.905761  |
| 1  | 0 | -1.320810 | 1.593939  | 1.678766  |
| 1  | 0 | -0.659314 | 3.259587  | 1.795963  |
| 34 | 0 | 1.626756  | 0.253150  | -0.025286 |
| 6  | 0 | 2.730420  | -1.346377 | -0.106431 |
| 1  | 0 | 3.747817  | -0.988912 | -0.315401 |
| 1  | 0 | 2.731461  | -1.885999 | 0.848405  |
| 1  | 0 | 2.395307  | -1.998993 | -0.922786 |

### 3a (S---S-F)

Symmetry C<sub>1</sub>  
 energy MP2 = -1204.3534964 au  
 Standard orientation

|    |   |           |           |           |
|----|---|-----------|-----------|-----------|
| 6  | 0 | 0.319751  | -0.874462 | -0.566101 |
| 6  | 0 | 0.626482  | 0.410664  | -0.055585 |
| 6  | 0 | 1.907784  | 0.665264  | 0.475306  |
| 6  | 0 | 2.872516  | -0.354810 | 0.501573  |
| 6  | 0 | 2.568617  | -1.637580 | 0.017506  |
| 6  | 0 | 1.289963  | -1.889350 | -0.506236 |
| 1  | 0 | 2.145678  | 1.656726  | 0.859137  |
| 1  | 0 | 3.859856  | -0.144528 | 0.917582  |
| 1  | 0 | 3.313924  | -2.433994 | 0.052004  |
| 1  | 0 | 1.040036  | -2.883114 | -0.886980 |
| 6  | 0 | -1.046318 | -1.131139 | -1.141720 |
| 1  | 0 | -1.176928 | -0.611081 | -2.104862 |
| 1  | 0 | -1.233521 | -2.204733 | -1.289195 |
| 16 | 0 | -2.311946 | -0.402979 | -0.070612 |
| 6  | 0 | -1.956842 | -1.279729 | 1.468383  |
| 1  | 0 | -2.142855 | -2.356210 | 1.348155  |
| 1  | 0 | -0.916695 | -1.103477 | 1.776671  |
| 1  | 0 | -2.640087 | -0.873087 | 2.225504  |
| 16 | 0 | -0.590512 | 1.709880  | -0.086391 |
| 9  | 0 | 0.522022  | 2.954437  | -0.171637 |

### 3a (S---S-Cl)

Symmetry C<sub>1</sub>  
 energy MP2 = -1564.3187378 au  
 Standard orientation

|   |   |           |           |           |
|---|---|-----------|-----------|-----------|
| 6 | 0 | 0.756233  | 0.654377  | -0.640635 |
| 6 | 0 | -0.478278 | 0.426975  | 0.019027  |
| 6 | 0 | -1.176660 | 1.498603  | 0.608241  |
| 6 | 0 | -0.660667 | 2.801596  | 0.529454  |
| 6 | 0 | 0.564663  | 3.040000  | -0.114616 |
| 6 | 0 | 1.265619  | 1.965272  | -0.685108 |
| 1 | 0 | -2.124442 | 1.312324  | 1.114929  |
| 1 | 0 | -1.212703 | 3.625640  | 0.985939  |
| 1 | 0 | 0.972951  | 4.050794  | -0.169918 |
| 1 | 0 | 2.221776  | 2.141331  | -1.185074 |
| 6 | 0 | 1.528433  | -0.492481 | -1.231471 |
| 1 | 0 | 0.932420  | -1.028263 | -1.986617 |
| 1 | 0 | 2.460888  | -0.141101 | -1.697059 |

|    |   |           |           |           |
|----|---|-----------|-----------|-----------|
| 16 | 0 | 1.899332  | -1.752832 | 0.027360  |
| 6  | 0 | 2.764351  | -0.718743 | 1.231063  |
| 1  | 0 | 3.669008  | -0.279821 | 0.786298  |
| 1  | 0 | 2.104887  | 0.076041  | 1.607067  |
| 1  | 0 | 3.053091  | -1.377633 | 2.060707  |
| 16 | 0 | -1.077677 | -1.246356 | 0.125524  |
| 17 | 0 | -3.094501 | -0.908582 | -0.132832 |

**3a (S---S-Br)**

Symmetry C<sub>1</sub>  
energy MP2 = -3677.2916306 au  
Standard orientation

|    |   |           |           |           |
|----|---|-----------|-----------|-----------|
| 6  | 0 | -1.331495 | 0.542737  | 0.647897  |
| 6  | 0 | -0.099717 | 0.551894  | -0.055147 |
| 6  | 0 | 0.366179  | 1.737404  | -0.655972 |
| 6  | 0 | -0.376633 | 2.922674  | -0.542693 |
| 6  | 0 | -1.599286 | 2.927532  | 0.149227  |
| 6  | 0 | -2.069364 | 1.738472  | 0.729475  |
| 1  | 0 | 1.312650  | 1.731530  | -1.198499 |
| 1  | 0 | -0.003193 | 3.836944  | -1.008379 |
| 1  | 0 | -2.183207 | 3.845906  | 0.233774  |
| 1  | 0 | -3.022536 | 1.732555  | 1.264877  |
| 6  | 0 | -1.865084 | -0.731565 | 1.240936  |
| 1  | 0 | -1.147354 | -1.175431 | 1.947937  |
| 1  | 0 | -2.816556 | -0.553444 | 1.763244  |
| 16 | 0 | -2.090939 | -2.009240 | -0.035935 |
| 6  | 0 | -3.188165 | -1.110857 | -1.156427 |
| 1  | 0 | -4.124407 | -0.838561 | -0.648139 |
| 1  | 0 | -2.694562 | -0.209525 | -1.546214 |
| 1  | 0 | -3.413974 | -1.792242 | -1.987458 |
| 16 | 0 | 0.781290  | -0.987717 | -0.210820 |
| 35 | 0 | 2.857969  | -0.288462 | 0.085233  |

**3a (S---S-I)**

Symmetry C<sub>1</sub>  
energy MP2 = -8022.7392527 au  
Standard orientation

|    |   |           |           |           |
|----|---|-----------|-----------|-----------|
| 6  | 0 | -1.711388 | 0.497625  | 0.642806  |
| 6  | 0 | -0.521782 | 0.575408  | -0.125480 |
| 6  | 0 | -0.142185 | 1.789850  | -0.729512 |
| 6  | 0 | -0.924333 | 2.940779  | -0.551072 |
| 6  | 0 | -2.102463 | 2.880512  | 0.212579  |
| 6  | 0 | -2.488357 | 1.662607  | 0.794409  |
| 1  | 0 | 0.770894  | 1.832507  | -1.326065 |
| 1  | 0 | -0.617507 | 3.878270  | -1.019225 |
| 1  | 0 | -2.716610 | 3.772140  | 0.352117  |
| 1  | 0 | -3.406834 | 1.608100  | 1.384924  |
| 6  | 0 | -2.168433 | -0.807201 | 1.233117  |
| 1  | 0 | -1.373266 | -1.277523 | 1.830670  |
| 1  | 0 | -3.052561 | -0.658093 | 1.870512  |
| 16 | 0 | -2.549963 | -2.030790 | -0.061591 |
| 6  | 0 | -3.806252 | -1.103945 | -0.972138 |
| 1  | 0 | -4.663943 | -0.869495 | -0.324993 |
| 1  | 0 | -3.384699 | -0.178560 | -1.389160 |
| 1  | 0 | -4.141844 | -1.752787 | -1.792176 |
| 16 | 0 | 0.408079  | -0.924201 | -0.373641 |

53            0            2.642409    -0.182802    0.082054

**3a (S---S-SSMe)**

Symmetry    C<sub>1</sub>  
energy        MP2 = -1542.1170063 au  
Standard orientation

|    |   |           |           |           |
|----|---|-----------|-----------|-----------|
| 6  | 0 | -0.898251 | 0.531006  | 0.596610  |
| 6  | 0 | 0.250973  | 0.473492  | -0.232228 |
| 6  | 0 | 0.758304  | 1.645209  | -0.825944 |
| 6  | 0 | 0.139334  | 2.882522  | -0.590689 |
| 6  | 0 | -0.999494 | 2.955775  | 0.229604  |
| 6  | 0 | -1.508547 | 1.783652  | 0.810131  |
| 1  | 0 | 1.645031  | 1.582162  | -1.459228 |
| 1  | 0 | 0.541809  | 3.784002  | -1.057566 |
| 1  | 0 | -1.486462 | 3.914929  | 0.415802  |
| 1  | 0 | -2.392875 | 1.833866  | 1.451277  |
| 6  | 0 | -1.487802 | -0.708420 | 1.211939  |
| 1  | 0 | -0.716051 | -1.313147 | 1.711248  |
| 1  | 0 | -2.260407 | -0.442221 | 1.948806  |
| 16 | 0 | -2.205569 | -1.827799 | -0.034304 |
| 6  | 0 | -3.400775 | -0.696210 | -0.780353 |
| 1  | 0 | -4.124252 | -0.340757 | -0.032118 |
| 1  | 0 | -2.892872 | 0.158445  | -1.248639 |
| 1  | 0 | -3.934641 | -1.267885 | -1.551359 |
| 16 | 0 | 1.018024  | -1.116995 | -0.518739 |
| 16 | 0 | 3.013187  | -0.658663 | -0.436698 |
| 6  | 0 | 3.233839  | -0.402887 | 1.344959  |
| 1  | 0 | 4.298207  | -0.171247 | 1.499175  |
| 1  | 0 | 2.621442  | 0.446191  | 1.678985  |
| 1  | 0 | 2.965308  | -1.313849 | 1.895304  |

**3a (S---S-C<sub>Me</sub>)**

Symmetry    C<sub>1</sub>  
energy        MP2 = -1144.4284973 au  
Standard orientation

|    |   |           |           |           |
|----|---|-----------|-----------|-----------|
| 6  | 0 | -0.275219 | 0.601095  | 0.600459  |
| 6  | 0 | 0.905613  | 0.053347  | 0.029415  |
| 6  | 0 | 1.890790  | 0.917466  | -0.492497 |
| 6  | 0 | 1.720530  | 2.310748  | -0.445541 |
| 6  | 0 | 0.557371  | 2.860058  | 0.115679  |
| 6  | 0 | -0.426208 | 2.000902  | 0.631067  |
| 1  | 0 | 2.794957  | 0.509221  | -0.944457 |
| 1  | 0 | 2.496660  | 2.960524  | -0.855492 |
| 1  | 0 | 0.418694  | 3.941953  | 0.157208  |
| 1  | 0 | -1.331175 | 2.418780  | 1.080592  |
| 6  | 0 | -1.358821 | -0.278028 | 1.160462  |
| 1  | 0 | -0.936210 | -1.078856 | 1.785832  |
| 1  | 0 | -2.055995 | 0.315399  | 1.770918  |
| 16 | 0 | -2.303826 | -1.154872 | -0.129478 |
| 6  | 0 | -2.926206 | 0.272672  | -1.045301 |
| 1  | 0 | -3.538245 | 0.918060  | -0.398037 |
| 1  | 0 | -2.099867 | 0.851872  | -1.480359 |
| 1  | 0 | -3.555895 | -0.122862 | -1.853715 |
| 16 | 0 | 1.075061  | -1.707604 | -0.015926 |
| 6  | 0 | 2.873800  | -1.903326 | -0.030043 |
| 1  | 0 | 3.050605  | -2.974406 | 0.138315  |



|   |   |          |           |           |
|---|---|----------|-----------|-----------|
| 1 | 0 | 3.310233 | -1.624565 | -0.997819 |
| 1 | 0 | 3.336574 | -1.325096 | 0.781273  |

**3b (S---Se-F)**

Symmetry C<sub>1</sub>  
 energy MP2 = -3206.7392001 au  
 Standard orientation

|    |   |           |           |           |
|----|---|-----------|-----------|-----------|
| 6  | 0 | 0.966377  | -0.880269 | -0.505855 |
| 6  | 0 | 0.626665  | 0.414445  | -0.051013 |
| 6  | 0 | 1.632311  | 1.275485  | 0.430477  |
| 6  | 0 | 2.966515  | 0.837946  | 0.471939  |
| 6  | 0 | 3.309120  | -0.455200 | 0.043035  |
| 6  | 0 | 2.304396  | -1.308309 | -0.441027 |
| 1  | 0 | 1.368294  | 2.277769  | 0.765957  |
| 1  | 0 | 3.736927  | 1.510788  | 0.854209  |
| 1  | 0 | 4.344304  | -0.797962 | 0.087550  |
| 1  | 0 | 2.558155  | -2.315230 | -0.783271 |
| 6  | 0 | -0.106211 | -1.776341 | -1.066875 |
| 1  | 0 | -0.391676 | -1.468848 | -2.086706 |
| 1  | 0 | 0.202447  | -2.831665 | -1.087887 |
| 16 | 0 | -1.630441 | -1.590976 | -0.109486 |
| 6  | 0 | -1.049363 | -2.110324 | 1.520238  |
| 1  | 0 | -0.800706 | -3.180573 | 1.508801  |
| 1  | 0 | -0.176566 | -1.511480 | 1.815341  |
| 1  | 0 | -1.876792 | -1.929948 | 2.218770  |
| 34 | 0 | -1.197449 | 1.024087  | -0.090366 |
| 9  | 0 | -0.673658 | 2.766580  | -0.097119 |

**3b (S---Se-Cl)**

Symmetry C<sub>1</sub>  
 energy MP2 = -3566.7031958 au  
 Standard orientation

|    |   |           |           |           |
|----|---|-----------|-----------|-----------|
| 6  | 0 | 1.309477  | 0.523497  | -0.598309 |
| 6  | 0 | 0.029791  | 0.703322  | -0.020658 |
| 6  | 0 | -0.317996 | 1.943054  | 0.546862  |
| 6  | 0 | 0.603294  | 3.003696  | 0.534546  |
| 6  | 0 | 1.877655  | 2.834059  | -0.030611 |
| 6  | 0 | 2.224215  | 1.591885  | -0.586379 |
| 1  | 0 | -1.304131 | 2.080275  | 0.990682  |
| 1  | 0 | 0.322538  | 3.959958  | 0.980625  |
| 1  | 0 | 2.596643  | 3.655149  | -0.032945 |
| 1  | 0 | 3.214788  | 1.446135  | -1.025466 |
| 6  | 0 | 1.687733  | -0.807510 | -1.189117 |
| 1  | 0 | 1.113895  | -1.019067 | -2.106242 |
| 1  | 0 | 2.761614  | -0.859723 | -1.420085 |
| 16 | 0 | 1.225670  | -2.151767 | -0.060920 |
| 6  | 0 | 2.126157  | -1.643768 | 1.421338  |
| 1  | 0 | 3.208946  | -1.665321 | 1.234126  |
| 1  | 0 | 1.811071  | -0.638604 | 1.734210  |
| 1  | 0 | 1.874864  | -2.371677 | 2.203888  |
| 34 | 0 | -1.195324 | -0.786481 | 0.003628  |
| 17 | 0 | -3.047759 | 0.452475  | -0.127849 |

**3b (S---Se-Br)**

Symmetry C<sub>1</sub>  
energy MP2 = -5679.675519 au  
Standard orientation

|    |   |           |           |           |
|----|---|-----------|-----------|-----------|
| 6  | 0 | 1.633371  | 0.643851  | -0.621869 |
| 6  | 0 | 0.361395  | 0.683570  | -0.001299 |
| 6  | 0 | -0.095945 | 1.874965  | 0.591113  |
| 6  | 0 | 0.704524  | 3.028896  | 0.557436  |
| 6  | 0 | 1.968520  | 3.000437  | -0.053913 |
| 6  | 0 | 2.426801  | 1.805469  | -0.631859 |
| 1  | 0 | -1.074795 | 1.903130  | 1.070514  |
| 1  | 0 | 0.338718  | 3.946722  | 1.022260  |
| 1  | 0 | 2.594301  | 3.894387  | -0.074699 |
| 1  | 0 | 3.411708  | 1.769516  | -1.105091 |
| 6  | 0 | 2.138926  | -0.637669 | -1.225928 |
| 1  | 0 | 1.542293  | -0.932586 | -2.104481 |
| 1  | 0 | 3.194818  | -0.556149 | -1.522218 |
| 16 | 0 | 1.923213  | -2.015881 | -0.062865 |
| 6  | 0 | 2.822900  | -1.365763 | 1.363473  |
| 1  | 0 | 3.884424  | -1.227803 | 1.113886  |
| 1  | 0 | 2.381567  | -0.415532 | 1.694915  |
| 1  | 0 | 2.728870  | -2.115723 | 2.159828  |
| 34 | 0 | -0.681607 | -0.937765 | 0.055514  |
| 35 | 0 | -2.810333 | 0.104846  | -0.085699 |

### 3b (S---Se-I)

Symmetry C<sub>1</sub>  
energy MP2 = -10025.1209058 au  
Standard orientation

|    |   |           |           |           |
|----|---|-----------|-----------|-----------|
| 6  | 0 | -1.935663 | 0.650104  | 0.655474  |
| 6  | 0 | -0.696766 | 0.680371  | -0.030223 |
| 6  | 0 | -0.263754 | 1.864033  | -0.655356 |
| 6  | 0 | -1.048260 | 3.026737  | -0.582230 |
| 6  | 0 | -2.276155 | 3.011316  | 0.099378  |
| 6  | 0 | -2.713564 | 1.822079  | 0.704451  |
| 1  | 0 | 0.687144  | 1.881477  | -1.189689 |
| 1  | 0 | -0.700039 | 3.939454  | -1.070041 |
| 1  | 0 | -2.890545 | 3.911774  | 0.153938  |
| 1  | 0 | -3.671916 | 1.797593  | 1.230050  |
| 6  | 0 | -2.435613 | -0.625798 | 1.275004  |
| 1  | 0 | -1.757382 | -0.983041 | 2.066254  |
| 1  | 0 | -3.441493 | -0.494323 | 1.699836  |
| 16 | 0 | -2.450645 | -1.975684 | 0.055606  |
| 6  | 0 | -3.460834 | -1.209502 | -1.232837 |
| 1  | 0 | -4.465833 | -0.982260 | -0.849494 |
| 1  | 0 | -2.981628 | -0.294211 | -1.607415 |
| 1  | 0 | -3.539407 | -1.943514 | -2.045694 |
| 34 | 0 | 0.312072  | -0.958315 | -0.142402 |
| 53 | 0 | 2.648012  | 0.038579  | 0.078533  |

### 3b (S---Se-SeMe)

Symmetry C<sub>1</sub>  
energy MP2 = -5546.8668862 au  
Standard orientation

|   |   |           |          |           |
|---|---|-----------|----------|-----------|
| 6 | 0 | -1.580757 | 0.661693 | 0.625820  |
| 6 | 0 | -0.409496 | 0.651574 | -0.170532 |
| 6 | 0 | 0.001836  | 1.817069 | -0.843118 |

|    |   |           |           |           |
|----|---|-----------|-----------|-----------|
| 6  | 0 | -0.737879 | 3.004027  | -0.717612 |
| 6  | 0 | -1.900659 | 3.029910  | 0.070969  |
| 6  | 0 | -2.313254 | 1.861328  | 0.730465  |
| 1  | 0 | 0.908385  | 1.796051  | -1.450897 |
| 1  | 0 | -0.409874 | 3.901735  | -1.246303 |
| 1  | 0 | -2.481674 | 3.948833  | 0.170598  |
| 1  | 0 | -3.218153 | 1.873353  | 1.344371  |
| 6  | 0 | -2.068919 | -0.581085 | 1.318860  |
| 1  | 0 | -1.282379 | -1.023970 | 1.949360  |
| 1  | 0 | -2.942239 | -0.356111 | 1.949092  |
| 16 | 0 | -2.496686 | -1.898840 | 0.136351  |
| 6  | 0 | -3.692743 | -0.999151 | -0.877121 |
| 1  | 0 | -4.543294 | -0.659316 | -0.268510 |
| 1  | 0 | -3.217450 | -0.141126 | -1.372783 |
| 1  | 0 | -4.053509 | -1.705334 | -1.636911 |
| 34 | 0 | 0.589878  | -0.990635 | -0.330982 |
| 34 | 0 | 2.731519  | -0.114564 | -0.213614 |
| 6  | 0 | 2.715774  | 0.374006  | 1.673648  |
| 1  | 0 | 3.702206  | 0.803504  | 1.900022  |
| 1  | 0 | 1.932920  | 1.124559  | 1.844264  |
| 1  | 0 | 2.541144  | -0.520201 | 2.284045  |

### 3b (S---Se-C<sub>Me</sub>)

Symmetry C<sub>1</sub>

energy MP2 = -3146.7971124 au

Standard orientation

|    |   |           |           |           |
|----|---|-----------|-----------|-----------|
| 6  | 0 | -0.820364 | 0.647523  | 0.616898  |
| 6  | 0 | 0.457602  | 0.633900  | 0.002750  |
| 6  | 0 | 0.978983  | 1.819097  | -0.553619 |
| 6  | 0 | 0.252371  | 3.019537  | -0.490966 |
| 6  | 0 | -1.013945 | 3.042812  | 0.115076  |
| 6  | 0 | -1.538206 | 1.859286  | 0.658722  |
| 1  | 0 | 1.952988  | 1.809772  | -1.045119 |
| 1  | 0 | 0.672855  | 3.927974  | -0.927748 |
| 1  | 0 | -1.587626 | 3.970285  | 0.164603  |
| 1  | 0 | -2.522316 | 1.869934  | 1.135371  |
| 6  | 0 | -1.423983 | -0.598340 | 1.204521  |
| 1  | 0 | -0.713354 | -1.103163 | 1.876705  |
| 1  | 0 | -2.335983 | -0.355154 | 1.770017  |
| 16 | 0 | -1.818450 | -1.848599 | -0.060505 |
| 6  | 0 | -2.913987 | -0.861683 | -1.105199 |
| 1  | 0 | -3.788037 | -0.511827 | -0.536554 |
| 1  | 0 | -2.377649 | -0.004340 | -1.535342 |
| 1  | 0 | -3.253857 | -1.520999 | -1.915203 |
| 34 | 0 | 1.446468  | -1.001362 | -0.076888 |
| 6  | 0 | 3.221335  | -0.241547 | 0.192696  |
| 1  | 0 | 3.880881  | -1.095034 | 0.400594  |
| 1  | 0 | 3.578298  | 0.276199  | -0.705514 |
| 1  | 0 | 3.210242  | 0.436733  | 1.055190  |

### 4a (Se---S-F)

Symmetry C<sub>1</sub>

energy MP2 = -3206.7220837 au

Standard orientation

|   |   |        |          |          |
|---|---|--------|----------|----------|
| 6 | 0 | 0.5947 | -0.83213 | -0.63332 |
| 6 | 0 | 1.056  | 0.37195  | -0.04555 |

|    |   |          |          |          |
|----|---|----------|----------|----------|
| 6  | 0 | 2.34103  | 0.42585  | 0.53103  |
| 6  | 0 | 3.16056  | -0.71465 | 0.52974  |
| 6  | 0 | 2.70221  | -1.91924 | -0.02769 |
| 6  | 0 | 1.41917  | -1.97038 | -0.59754 |
| 1  | 0 | 2.69467  | 1.35762  | 0.97211  |
| 1  | 0 | 4.15296  | -0.6606  | 0.98173  |
| 1  | 0 | 3.33181  | -2.8106  | -0.01472 |
| 1  | 0 | 1.05299  | -2.90202 | -1.03677 |
| 6  | 0 | -0.77101 | -0.88305 | -1.25349 |
| 1  | 0 | -0.83776 | -0.23905 | -2.14457 |
| 1  | 0 | -1.06794 | -1.90657 | -1.51873 |
| 34 | 0 | -2.06159 | -0.10328 | -0.01808 |
| 6  | 0 | -1.63717 | -1.22409 | 1.50818  |
| 1  | 0 | -1.87258 | -2.2721  | 1.28196  |
| 1  | 0 | -0.57518 | -1.10994 | 1.76292  |
| 1  | 0 | -2.2636  | -0.87292 | 2.33821  |
| 16 | 0 | 0.03287  | 1.82832  | -0.03797 |
| 9  | 0 | 1.30664  | 2.90546  | -0.16313 |

#### 4a (Se---S-Cl)

Symmetry C<sub>1</sub>  
 energy MP2 = -3566.6878454 au  
 Standard orientation

|    |   |           |           |           |
|----|---|-----------|-----------|-----------|
| 6  | 0 | -0.061177 | 1.002565  | 0.694984  |
| 6  | 0 | 0.969929  | 0.341306  | -0.019970 |
| 6  | 0 | 1.987401  | 1.082370  | -0.650820 |
| 6  | 0 | 1.995524  | 2.483244  | -0.561031 |
| 6  | 0 | 0.975951  | 3.152294  | 0.136131  |
| 6  | 0 | -0.045845 | 2.409137  | 0.749083  |
| 1  | 0 | 2.773598  | 0.560878  | -1.198606 |
| 1  | 0 | 2.791360  | 3.048381  | -1.050316 |
| 1  | 0 | 0.973471  | 4.241963  | 0.200732  |
| 1  | 0 | -0.843784 | 2.923461  | 1.291253  |
| 6  | 0 | -1.174555 | 0.223722  | 1.328242  |
| 1  | 0 | -0.796229 | -0.538638 | 2.025539  |
| 1  | 0 | -1.880695 | 0.882120  | 1.851666  |
| 34 | 0 | -2.130964 | -0.810421 | -0.032800 |
| 6  | 0 | -2.474218 | 0.670769  | -1.240598 |
| 1  | 0 | -3.091581 | 1.430072  | -0.742826 |
| 1  | 0 | -1.524677 | 1.105878  | -1.578880 |
| 1  | 0 | -3.021034 | 0.254533  | -2.096673 |
| 16 | 0 | 0.908020  | -1.434229 | -0.144126 |
| 17 | 0 | 2.912116  | -1.858772 | 0.123718  |

#### 4a (Se---S-Br)

Symmetry C<sub>1</sub>  
 energy MP2 = -5679.6608911 au  
 Standard orientation

|   |   |           |          |           |
|---|---|-----------|----------|-----------|
| 6 | 0 | -0.820472 | 1.010822 | 0.700997  |
| 6 | 0 | 0.351546  | 0.745098 | -0.052671 |
| 6 | 0 | 1.037615  | 1.793511 | -0.695109 |
| 6 | 0 | 0.577050  | 3.113870 | -0.574938 |
| 6 | 0 | -0.583898 | 3.391783 | 0.165794  |
| 6 | 0 | -1.275732 | 2.340313 | 0.788307  |
| 1 | 0 | 1.935163  | 1.573960 | -1.275371 |
| 1 | 0 | 1.119329  | 3.919912 | -1.073343 |

|    |   |           |           |           |
|----|---|-----------|-----------|-----------|
| 1  | 0 | -0.949858 | 4.416224  | 0.256371  |
| 1  | 0 | -2.182420 | 2.549103  | 1.362362  |
| 6  | 0 | -1.593185 | -0.105495 | 1.336014  |
| 1  | 0 | -0.960745 | -0.722178 | 1.991617  |
| 1  | 0 | -2.453641 | 0.272295  | 1.904419  |
| 34 | 0 | -2.218757 | -1.356863 | -0.036183 |
| 6  | 0 | -3.078537 | -0.034985 | -1.169428 |
| 1  | 0 | -3.885165 | 0.468287  | -0.620204 |
| 1  | 0 | -2.337918 | 0.694510  | -1.522563 |
| 1  | 0 | -3.499869 | -0.582820 | -2.022391 |
| 16 | 0 | 0.873533  | -0.949595 | -0.220355 |
| 35 | 0 | 3.056858  | -0.708341 | 0.078892  |

#### 4a (Se---S-I)

Symmetry C<sub>1</sub>  
 energy MP2 = -10025.1085851 au  
 Standard orientation

|    |   |           |           |           |
|----|---|-----------|-----------|-----------|
| 6  | 0 | -1.248535 | 0.945789  | 0.692440  |
| 6  | 0 | -0.092341 | 0.826951  | -0.120720 |
| 6  | 0 | 0.446065  | 1.956909  | -0.765850 |
| 6  | 0 | -0.141151 | 3.218377  | -0.585288 |
| 6  | 0 | -1.283789 | 3.353387  | 0.221555  |
| 6  | 0 | -1.830078 | 2.220164  | 0.844642  |
| 1  | 0 | 1.330632  | 1.846041  | -1.395801 |
| 1  | 0 | 0.287622  | 4.089178  | -1.085314 |
| 1  | 0 | -1.747365 | 4.331512  | 0.363321  |
| 1  | 0 | -2.721901 | 2.319472  | 1.469180  |
| 6  | 0 | -1.877716 | -0.257875 | 1.325357  |
| 1  | 0 | -1.144680 | -0.863784 | 1.876986  |
| 1  | 0 | -2.699252 | 0.026201  | 1.996851  |
| 34 | 0 | -2.567566 | -1.473855 | -0.050320 |
| 6  | 0 | -3.668191 | -0.163833 | -0.968977 |
| 1  | 0 | -4.433176 | 0.234515  | -0.289289 |
| 1  | 0 | -3.040248 | 0.646804  | -1.361176 |
| 1  | 0 | -4.154678 | -0.692835 | -1.798961 |
| 16 | 0 | 0.587013  | -0.801027 | -0.373749 |
| 53 | 0 | 2.913255  | -0.407713 | 0.076531  |

#### 4a (Se---S-SMe)

Symmetry C<sub>1</sub>  
 energy MP2 = -3544.4861371 au  
 Standard orientation

|    |   |           |           |           |
|----|---|-----------|-----------|-----------|
| 6  | 0 | -0.353461 | 0.882309  | 0.631929  |
| 6  | 0 | 0.725525  | 0.574179  | -0.235681 |
| 6  | 0 | 1.456525  | 1.604263  | -0.857591 |
| 6  | 0 | 1.133657  | 2.947891  | -0.612888 |
| 6  | 0 | 0.068012  | 3.270050  | 0.245120  |
| 6  | 0 | -0.665357 | 2.239813  | 0.853796  |
| 1  | 0 | 2.284553  | 1.345903  | -1.520196 |
| 1  | 0 | 1.707366  | 3.738398  | -1.101270 |
| 1  | 0 | -0.189549 | 4.312992  | 0.439539  |
| 1  | 0 | -1.492779 | 2.485039  | 1.525236  |
| 6  | 0 | -1.175089 | -0.191330 | 1.279410  |
| 1  | 0 | -0.547343 | -0.978629 | 1.720741  |
| 1  | 0 | -1.833098 | 0.226697  | 2.053533  |
| 34 | 0 | -2.280018 | -1.141200 | -0.035272 |

|    |   |           |           |           |
|----|---|-----------|-----------|-----------|
| 6  | 0 | -3.163223 | 0.431962  | -0.753613 |
| 1  | 0 | -3.726730 | 0.948142  | 0.035078  |
| 1  | 0 | -2.424390 | 1.106957  | -1.204700 |
| 1  | 0 | -3.858191 | 0.073974  | -1.524627 |
| 16 | 0 | 1.115325  | -1.144770 | -0.537841 |
| 16 | 0 | 3.163051  | -1.141049 | -0.441062 |
| 6  | 0 | 3.419936  | -0.951101 | 1.343805  |
| 1  | 0 | 4.507928  | -0.957722 | 1.506821  |
| 1  | 0 | 3.004500  | 0.009025  | 1.680348  |
| 1  | 0 | 2.955170  | -1.785086 | 1.885450  |

**4a (Se---S-C<sub>Me</sub>)**

Symmetry C<sub>1</sub>

energy MP2 = -3146.7975832 au

Standard orientation

|    |   |           |           |           |
|----|---|-----------|-----------|-----------|
| 6  | 0 | 0.292135  | 0.721954  | 0.647131  |
| 6  | 0 | 1.326973  | -0.053745 | 0.055354  |
| 6  | 0 | 2.446989  | 0.592460  | -0.507341 |
| 6  | 0 | 2.554475  | 1.992755  | -0.481098 |
| 6  | 0 | 1.539065  | 2.766876  | 0.101309  |
| 6  | 0 | 0.421880  | 2.124739  | 0.658474  |
| 1  | 0 | 3.241314  | 0.009684  | -0.973769 |
| 1  | 0 | 3.431004  | 2.471928  | -0.922359 |
| 1  | 0 | 1.617596  | 3.855248  | 0.128889  |
| 1  | 0 | -0.367900 | 2.717995  | 1.127504  |
| 6  | 0 | -0.920199 | 0.082831  | 1.252029  |
| 1  | 0 | -0.662214 | -0.815491 | 1.831547  |
| 1  | 0 | -1.455298 | 0.789139  | 1.901678  |
| 34 | 0 | -2.181873 | -0.559047 | -0.110149 |
| 6  | 0 | -2.468031 | 1.162852  | -0.959996 |
| 1  | 0 | -2.882155 | 1.880973  | -0.239357 |
| 1  | 0 | -1.526480 | 1.538442  | -1.381075 |
| 1  | 0 | -3.193822 | 0.996694  | -1.767079 |
| 16 | 0 | 1.137130  | -1.811503 | 0.041578  |
| 6  | 0 | 2.847112  | -2.373947 | -0.126756 |
| 1  | 0 | 2.811964  | -3.459819 | 0.035270  |
| 1  | 0 | 3.244390  | -2.181924 | -1.131852 |
| 1  | 0 | 3.488789  | -1.911880 | 0.635788  |

**4b (Se---Se-F)**

Symmetry C<sub>1</sub>

energy MP2 = -5209.10778 au

Standard orientation

|   |   |           |           |           |
|---|---|-----------|-----------|-----------|
| 6 | 0 | 0.734396  | -1.125632 | -0.558871 |
| 6 | 0 | 1.052313  | 0.156795  | -0.053383 |
| 6 | 0 | 2.338402  | 0.409883  | 0.462317  |
| 6 | 0 | 3.296803  | -0.616801 | 0.491776  |
| 6 | 0 | 2.982458  | -1.900133 | 0.015322  |
| 6 | 0 | 1.701533  | -2.146302 | -0.504719 |
| 1 | 0 | 2.582492  | 1.404384  | 0.834555  |
| 1 | 0 | 4.287461  | -0.411152 | 0.902483  |
| 1 | 0 | 3.722498  | -2.701547 | 0.050264  |
| 1 | 0 | 1.447482  | -3.138983 | -0.886022 |
| 6 | 0 | -0.618698 | -1.388375 | -1.157510 |
| 1 | 0 | -0.734664 | -0.897531 | -2.137472 |
| 1 | 0 | -0.830924 | -2.461107 | -1.260784 |

|    |   |           |           |           |
|----|---|-----------|-----------|-----------|
| 34 | 0 | -1.983362 | -0.543945 | -0.057070 |
| 6  | 0 | -1.527529 | -1.406520 | 1.619766  |
| 1  | 0 | -1.752168 | -2.479174 | 1.559577  |
| 1  | 0 | -0.463654 | -1.236777 | 1.831850  |
| 1  | 0 | -2.147873 | -0.934135 | 2.392040  |
| 34 | 0 | -0.240015 | 1.584415  | -0.063075 |
| 9  | 0 | 1.080680  | 2.842506  | -0.121086 |

**4b (Se---Se-Cl)**

Symmetry C<sub>1</sub>

energy MP2 = -5569.0723486 au

Standard orientation

|    |   |           |           |           |
|----|---|-----------|-----------|-----------|
| 6  | 0 | 0.397126  | 1.316716  | -0.654888 |
| 6  | 0 | -0.703219 | 0.692289  | -0.019189 |
| 6  | 0 | -1.703183 | 1.473236  | 0.588453  |
| 6  | 0 | -1.612754 | 2.875151  | 0.561790  |
| 6  | 0 | -0.522388 | 3.505529  | -0.059288 |
| 6  | 0 | 0.478223  | 2.721559  | -0.656428 |
| 1  | 0 | -2.549608 | 0.988066  | 1.075129  |
| 1  | 0 | -2.393037 | 3.470552  | 1.040221  |
| 1  | 0 | -0.446153 | 4.594204  | -0.073459 |
| 1  | 0 | 1.332548  | 3.202045  | -1.140689 |
| 6  | 0 | 1.477813  | 0.488530  | -1.286191 |
| 1  | 0 | 1.106061  | -0.088015 | -2.147990 |
| 1  | 0 | 2.338839  | 1.096432  | -1.594691 |
| 34 | 0 | 2.056323  | -0.886222 | -0.025675 |
| 6  | 0 | 2.419114  | 0.289784  | 1.475464  |
| 1  | 0 | 3.241935  | 0.971339  | 1.223710  |
| 1  | 0 | 1.509991  | 0.850804  | 1.728655  |
| 1  | 0 | 2.711565  | -0.356379 | 2.313055  |
| 34 | 0 | -0.787975 | -1.234856 | 0.034299  |
| 17 | 0 | -3.021197 | -1.340537 | -0.142088 |

**4b (Se---Se-Br)**

Symmetry C<sub>1</sub>

energy MP2 = -7682.0448723 au

Standard orientation

|    |   |           |           |           |
|----|---|-----------|-----------|-----------|
| 6  | 0 | 1.121366  | 1.183390  | -0.675502 |
| 6  | 0 | -0.092011 | 0.909935  | 0.001585  |
| 6  | 0 | -0.798309 | 1.950167  | 0.632271  |
| 6  | 0 | -0.305806 | 3.265048  | 0.583435  |
| 6  | 0 | 0.897566  | 3.548350  | -0.082727 |
| 6  | 0 | 1.605883  | 2.504524  | -0.700037 |
| 1  | 0 | -1.731440 | 1.734533  | 1.153688  |
| 1  | 0 | -0.861787 | 4.063470  | 1.079100  |
| 1  | 0 | 1.285737  | 4.567898  | -0.116045 |
| 1  | 0 | 2.545993  | 2.713719  | -1.217430 |
| 6  | 0 | 1.899420  | 0.073030  | -1.317908 |
| 1  | 0 | 1.341625  | -0.401055 | -2.140702 |
| 1  | 0 | 2.877609  | 0.412473  | -1.683960 |
| 34 | 0 | 2.144843  | -1.375759 | -0.029073 |
| 6  | 0 | 2.871557  | -0.300276 | 1.414606  |
| 1  | 0 | 3.827590  | 0.141646  | 1.105168  |
| 1  | 0 | 2.150884  | 0.481144  | 1.689086  |
| 1  | 0 | 3.031414  | -0.982121 | 2.259724  |
| 34 | 0 | -0.715301 | -0.914087 | 0.088066  |

35                    0                    -3.036287                    -0.390913                    -0.093392

**4b (Se---Se-I)**

Symmetry    C<sub>1</sub>  
energy        MP2 = -12027.4903324 au  
Standard orientation

|    |   |           |           |           |
|----|---|-----------|-----------|-----------|
| 6  | 0 | -1.487871 | 1.109808  | 0.704167  |
| 6  | 0 | -0.290465 | 0.932895  | -0.031724 |
| 6  | 0 | 0.303525  | 2.024096  | -0.691237 |
| 6  | 0 | -0.277274 | 3.300204  | -0.605276 |
| 6  | 0 | -1.461734 | 3.490707  | 0.125010  |
| 6  | 0 | -2.061467 | 2.394304  | 0.765475  |
| 1  | 0 | 1.221476  | 1.879901  | -1.262903 |
| 1  | 0 | 0.193748  | 4.139666  | -1.120739 |
| 1  | 0 | -1.918883 | 4.479699  | 0.190321  |
| 1  | 0 | -2.987384 | 2.532334  | 1.330200  |
| 6  | 0 | -2.165097 | -0.057414 | 1.358078  |
| 1  | 0 | -1.515933 | -0.552758 | 2.096288  |
| 1  | 0 | -3.109819 | 0.234503  | 1.835986  |
| 34 | 0 | -2.510458 | -1.450526 | 0.026042  |
| 6  | 0 | -3.388354 | -0.314834 | -1.281923 |
| 1  | 0 | -4.303492 | 0.113808  | -0.852907 |
| 1  | 0 | -2.701856 | 0.478863  | -1.604473 |
| 1  | 0 | -3.643929 | -0.960787 | -2.131845 |
| 34 | 0 | 0.439568  | -0.846714 | -0.168881 |
| 53 | 0 | 2.908467  | -0.217315 | 0.081532  |

**4b (Se---Se-SeMe)**

Symmetry    C<sub>1</sub>  
energy        MP2 = -7549.2359593 au  
Standard orientation

|    |   |           |           |           |
|----|---|-----------|-----------|-----------|
| 6  | 0 | -1.095479 | 1.068016  | 0.654958  |
| 6  | 0 | 0.031766  | 0.861438  | -0.178016 |
| 6  | 0 | 0.618282  | 1.941299  | -0.863084 |
| 6  | 0 | 0.099651  | 3.237877  | -0.715242 |
| 6  | 0 | -1.016742 | 3.459505  | 0.109001  |
| 6  | 0 | -1.604980 | 2.376862  | 0.781592  |
| 1  | 0 | 1.488596  | 1.766166  | -1.498363 |
| 1  | 0 | 0.561513  | 4.068211  | -1.253892 |
| 1  | 0 | -1.426575 | 4.464522  | 0.227186  |
| 1  | 0 | -2.473940 | 2.543123  | 1.424315  |
| 6  | 0 | -1.770200 | -0.069820 | 1.360746  |
| 1  | 0 | -1.055175 | -0.683890 | 1.928149  |
| 1  | 0 | -2.557112 | 0.291447  | 2.036759  |
| 34 | 0 | -2.562073 | -1.323632 | 0.076605  |
| 6  | 0 | -3.560747 | -0.000494 | -0.935488 |
| 1  | 0 | -4.285488 | 0.508983  | -0.286692 |
| 1  | 0 | -2.871806 | 0.724402  | -1.388262 |
| 1  | 0 | -4.094719 | -0.549313 | -1.722344 |
| 34 | 0 | 0.730401  | -0.925421 | -0.373087 |
| 34 | 0 | 2.988504  | -0.425014 | -0.203335 |
| 6  | 0 | 3.013251  | 0.030463  | 1.691911  |
| 1  | 0 | 4.051669  | 0.288500  | 1.944660  |
| 1  | 0 | 2.360763  | 0.897102  | 1.861392  |
| 1  | 0 | 2.681172  | -0.831850 | 2.282625  |



**4b (Se---Se-C<sub>Me</sub>)**

Symmetry C<sub>1</sub>  
energy MP2 = -5149.1659943 au  
Standard orientation

|    |   |           |           |           |
|----|---|-----------|-----------|-----------|
| 6  | 0 | -0.067598 | 1.039242  | 0.663939  |
| 6  | 0 | 1.048717  | 0.464423  | 0.004305  |
| 6  | 0 | 2.017428  | 1.296872  | -0.590442 |
| 6  | 0 | 1.899753  | 2.694885  | -0.521806 |
| 6  | 0 | 0.798514  | 3.274316  | 0.128778  |
| 6  | 0 | -0.172646 | 2.444474  | 0.710874  |
| 1  | 0 | 2.865953  | 0.856648  | -1.116639 |
| 1  | 0 | 2.660400  | 3.324442  | -0.988565 |
| 1  | 0 | 0.696056  | 4.359803  | 0.184222  |
| 1  | 0 | -1.029877 | 2.889498  | 1.223562  |
| 6  | 0 | -1.132308 | 0.193420  | 1.294120  |
| 1  | 0 | -0.701052 | -0.613021 | 1.905067  |
| 1  | 0 | -1.805874 | 0.801197  | 1.913599  |
| 34 | 0 | -2.204748 | -0.747270 | -0.053025 |
| 6  | 0 | -2.697114 | 0.827867  | -1.076507 |
| 1  | 0 | -3.259235 | 1.532063  | -0.448637 |
| 1  | 0 | -1.798485 | 1.308398  | -1.484575 |
| 1  | 0 | -3.337094 | 0.478984  | -1.897684 |
| 34 | 0 | 1.211572  | -1.439280 | -0.088647 |
| 6  | 0 | 3.139609  | -1.541478 | 0.185954  |
| 1  | 0 | 3.356861  | -2.600488 | 0.380846  |
| 1  | 0 | 3.689858  | -1.220996 | -0.706623 |
| 1  | 0 | 3.424337  | -0.937965 | 1.056948  |

**5c (Te---Te-F)**

Symmetry C<sub>1</sub>  
energy MP2 = -13632.7611676 au  
Standard orientation

|    |   |           |           |           |
|----|---|-----------|-----------|-----------|
| 6  | 0 | -0.717989 | 1.466770  | -0.612290 |
| 6  | 0 | -1.320145 | 0.308449  | -0.063753 |
| 6  | 0 | -2.619667 | 0.391377  | 0.477705  |
| 6  | 0 | -3.300942 | 1.620023  | 0.507496  |
| 6  | 0 | -2.695335 | 2.778447  | -0.004901 |
| 6  | 0 | -1.409945 | 2.693184  | -0.563413 |
| 1  | 0 | -3.094510 | -0.506347 | 0.874637  |
| 1  | 0 | -4.300392 | 1.668863  | 0.944854  |
| 1  | 0 | -3.215061 | 3.737840  | 0.026704  |
| 1  | 0 | -0.937832 | 3.586442  | -0.981661 |
| 6  | 0 | 0.631389  | 1.414226  | -1.275637 |
| 1  | 0 | 0.606290  | 0.841899  | -2.217662 |
| 1  | 0 | 1.040592  | 2.414743  | -1.468823 |
| 52 | 0 | 1.986338  | 0.301751  | -0.039515 |
| 6  | 0 | 1.519618  | 1.384912  | 1.739083  |
| 1  | 0 | 1.920335  | 2.404308  | 1.673024  |
| 1  | 0 | 0.426567  | 1.394051  | 1.848611  |
| 1  | 0 | 1.981427  | 0.849623  | 2.578838  |
| 52 | 0 | -0.358973 | -1.593571 | -0.031766 |
| 9  | 0 | -2.174698 | -2.395681 | -0.088626 |

**5c (Te---Te-Cl)**

Symmetry C<sub>1</sub>  
energy MP2 = -13992.7214604 au  
Standard orientation

|    |   |           |           |           |
|----|---|-----------|-----------|-----------|
| 6  | 0 | 0.211505  | 1.613911  | -0.695669 |
| 6  | 0 | -0.851456 | 0.947987  | -0.036640 |
| 6  | 0 | -1.861237 | 1.700833  | 0.593759  |
| 6  | 0 | -1.813052 | 3.105507  | 0.583094  |
| 6  | 0 | -0.755925 | 3.772006  | -0.056297 |
| 6  | 0 | 0.249009  | 3.022188  | -0.688659 |
| 1  | 0 | -2.686465 | 1.191415  | 1.093127  |
| 1  | 0 | -2.598295 | 3.673025  | 1.086829  |
| 1  | 0 | -0.709353 | 4.862585  | -0.061700 |
| 1  | 0 | 1.072144  | 3.533364  | -1.195396 |
| 6  | 0 | 1.303640  | 0.850899  | -1.389911 |
| 1  | 0 | 0.924488  | 0.250773  | -2.232853 |
| 1  | 0 | 2.112521  | 1.506339  | -1.738358 |
| 52 | 0 | 2.093097  | -0.616388 | -0.028219 |
| 6  | 0 | 2.247552  | 0.743599  | 1.610629  |
| 1  | 0 | 3.012741  | 1.499669  | 1.393903  |
| 1  | 0 | 1.264890  | 1.209519  | 1.763847  |
| 1  | 0 | 2.535193  | 0.158790  | 2.494020  |
| 52 | 0 | -0.941410 | -1.184997 | 0.035194  |
| 17 | 0 | -3.364459 | -1.103238 | -0.146352 |

**5c (Te---Te-Br)**

Symmetry C<sub>1</sub>  
energy MP2 = -16105.6921829 au  
Standard orientation

|    |   |           |           |           |
|----|---|-----------|-----------|-----------|
| 6  | 0 | 0.827885  | 1.573788  | -0.713881 |
| 6  | 0 | -0.322809 | 1.127639  | -0.017652 |
| 6  | 0 | -1.147628 | 2.062223  | 0.637567  |
| 6  | 0 | -0.832397 | 3.431601  | 0.610848  |
| 6  | 0 | 0.310556  | 3.880492  | -0.069453 |
| 6  | 0 | 1.133056  | 2.949205  | -0.723820 |
| 1  | 0 | -2.038041 | 1.722840  | 1.168745  |
| 1  | 0 | -1.477453 | 4.141032  | 1.133407  |
| 1  | 0 | 0.563868  | 4.942107  | -0.089112 |
| 1  | 0 | 2.022447  | 3.291011  | -1.260288 |
| 6  | 0 | 1.737539  | 0.610814  | -1.421172 |
| 1  | 0 | 1.225260  | 0.066661  | -2.230858 |
| 1  | 0 | 2.636200  | 1.101918  | -1.816705 |
| 52 | 0 | 2.307869  | -0.938595 | -0.038277 |
| 6  | 0 | 2.737165  | 0.414555  | 1.557167  |
| 1  | 0 | 3.602144  | 1.035882  | 1.292750  |
| 1  | 0 | 1.847208  | 1.033222  | 1.734013  |
| 1  | 0 | 2.965223  | -0.189933 | 2.444727  |
| 52 | 0 | -0.802713 | -0.952062 | 0.079568  |
| 35 | 0 | -3.322149 | -0.432356 | -0.105184 |

**5c (Te---Te-I)**

Symmetry C<sub>1</sub>  
energy MP2 = -20451.1342904 au  
Standard orientation

|   |   |           |          |           |
|---|---|-----------|----------|-----------|
| 6 | 0 | 1.201464  | 1.515400 | -0.743037 |
| 6 | 0 | 0.053425  | 1.155634 | 0.005951  |
| 6 | 0 | -0.668786 | 2.147055 | 0.697408  |

|    |   |           |           |           |
|----|---|-----------|-----------|-----------|
| 6  | 0 | -0.262265 | 3.491319  | 0.645269  |
| 6  | 0 | 0.873935  | 3.856333  | -0.094128 |
| 6  | 0 | 1.598509  | 2.867017  | -0.778322 |
| 1  | 0 | -1.552910 | 1.873300  | 1.275524  |
| 1  | 0 | -0.830052 | 4.245840  | 1.193701  |
| 1  | 0 | 1.197718  | 4.897984  | -0.135936 |
| 1  | 0 | 2.484161  | 3.143685  | -1.356884 |
| 6  | 0 | 2.020150  | 0.485392  | -1.464531 |
| 1  | 0 | 1.433546  | -0.071467 | -2.212315 |
| 1  | 0 | 2.908728  | 0.921060  | -1.939587 |
| 52 | 0 | 2.627508  | -1.024157 | -0.047745 |
| 6  | 0 | 3.168501  | 0.384794  | 1.464495  |
| 1  | 0 | 4.013001  | 0.993675  | 1.117770  |
| 1  | 0 | 2.295642  | 1.013616  | 1.684656  |
| 1  | 0 | 3.460083  | -0.189064 | 2.353880  |
| 52 | 0 | -0.546314 | -0.890520 | 0.137203  |
| 53 | 0 | -3.236634 | -0.239304 | -0.094929 |

### 5c (Te---Te-TeMe)

Symmetry C<sub>1</sub>

energy MP2 = -20184.6924597 au

Standard orientation

|    |   |           |           |           |
|----|---|-----------|-----------|-----------|
| 6  | 0 | -1.203091 | 1.385370  | 0.709090  |
| 6  | 0 | -0.119879 | 1.093925  | -0.158471 |
| 6  | 0 | 0.477732  | 2.125799  | -0.908596 |
| 6  | 0 | 0.017517  | 3.448400  | -0.799115 |
| 6  | 0 | -1.051640 | 3.749278  | 0.061054  |
| 6  | 0 | -1.651618 | 2.720388  | 0.803206  |
| 1  | 0 | 1.315088  | 1.897844  | -1.571628 |
| 1  | 0 | 0.488872  | 4.235147  | -1.392329 |
| 1  | 0 | -1.416293 | 4.774248  | 0.154461  |
| 1  | 0 | -2.484040 | 2.949745  | 1.474538  |
| 6  | 0 | -1.912358 | 0.319564  | 1.486678  |
| 1  | 0 | -1.215737 | -0.343172 | 2.022254  |
| 1  | 0 | -2.632075 | 0.748160  | 2.195923  |
| 52 | 0 | -2.971941 | -0.994870 | 0.125447  |
| 6  | 0 | -3.601049 | 0.595445  | -1.159988 |
| 1  | 0 | -4.247845 | 1.292188  | -0.612314 |
| 1  | 0 | -2.716539 | 1.113604  | -1.552929 |
| 1  | 0 | -4.165081 | 0.136601  | -1.983169 |
| 52 | 0 | 0.599896  | -0.908089 | -0.342269 |
| 52 | 0 | 3.204918  | -0.245487 | -0.123674 |
| 6  | 0 | 3.116866  | 0.226967  | 1.972091  |
| 1  | 0 | 4.127102  | 0.515418  | 2.294678  |
| 1  | 0 | 2.423305  | 1.065566  | 2.114048  |
| 1  | 0 | 2.778978  | -0.657018 | 2.526563  |

### 5c (Te---Te-C<sub>Me</sub>)

Symmetry C<sub>1</sub>

energy MP2 = -13572.7942334 au

Standard orientation

|   |   |           |          |           |
|---|---|-----------|----------|-----------|
| 6 | 0 | -0.054241 | 1.342573 | 0.752843  |
| 6 | 0 | 1.062007  | 0.849434 | 0.029015  |
| 6 | 0 | 1.919908  | 1.755494 | -0.629237 |
| 6 | 0 | 1.694151  | 3.140775 | -0.565276 |
| 6 | 0 | 0.592067  | 3.635187 | 0.150558  |

|    |   |           |           |           |
|----|---|-----------|-----------|-----------|
| 6  | 0 | -0.270954 | 2.736225  | 0.796165  |
| 1  | 0 | 2.768862  | 1.381291  | -1.205027 |
| 1  | 0 | 2.369648  | 3.824413  | -1.083875 |
| 1  | 0 | 0.402728  | 4.709033  | 0.204395  |
| 1  | 0 | -1.129705 | 3.117486  | 1.355658  |
| 6  | 0 | -1.021868 | 0.432744  | 1.443975  |
| 1  | 0 | -0.510488 | -0.346169 | 2.029463  |
| 1  | 0 | -1.707521 | 0.993063  | 2.092333  |
| 52 | 0 | -2.193392 | -0.667097 | -0.013255 |
| 6  | 0 | -2.392482 | 1.001475  | -1.337713 |
| 1  | 0 | -2.933597 | 1.817900  | -0.843369 |
| 1  | 0 | -1.395470 | 1.333386  | -1.655263 |
| 1  | 0 | -2.965953 | 0.652599  | -2.207133 |
| 52 | 0 | 1.475123  | -1.225952 | -0.083341 |
| 6  | 0 | 3.580481  | -0.943425 | 0.255400  |
| 1  | 0 | 4.005135  | -1.935847 | 0.461005  |
| 1  | 0 | 4.070281  | -0.517453 | -0.628387 |
| 1  | 0 | 3.721651  | -0.294089 | 1.128781  |
